# Supplementary material for: Prognostic accuracy of antenatal Doppler ultrasound for adverse perinatal outcomes in low-income and middle-income countries: a systematic review
Source: HighWire-hosted journal article supplement (doi:10.1136/bmjopen-2021-049799), 2021-12-01
Supplement: bmjopen-2021-049799supp004_data_supplement.pdf [file bmjopen-2021-049799supp004_data_supplement.pdf]

**Appendix S4.** Risk of bias assessment results of the 30 studies included in the analysis**First Author:** Abdallah et al., 2018**ID:** 68614233

| Potential Bias                                                                    | Items to be considered for assessment of potential opportunity for bias                                                                     | Yes                   | Partly | No | Unsure | NA* |
|-----------------------------------------------------------------------------------|---------------------------------------------------------------------------------------------------------------------------------------------|-----------------------|--------|----|--------|-----|
| Study population /sample selection                                                | Inclusion and exclusion criteria are adequately described [including explicit diagnostic criteria, start/finish date of recruitment]        | x                     |        |    |        |     |
|                                                                                   | Baseline study sample [i.e., individuals entering the study and their key characteristics and sampling frame are adequately described]      | x                     |        |    |        |     |
|                                                                                   | Study sample represents population of interest on key characteristics, sufficient to limit potential bias to results                        | Low risk of bias      |        |    |        |     |
| Study attrition                                                                   | Response rate (i.e., proportion of study sample completing the study and providing outcome data) is adequate                                |                       |        |    | x      |     |
|                                                                                   | Participants lost to follow-up are adequately described for key characteristics                                                             |                       |        |    | x      |     |
|                                                                                   | Statement as to the possible effect on the results from missing data                                                                        |                       |        |    | x      |     |
|                                                                                   | Loss to follow-up is not associated with key characteristics                                                                                | Moderate risk of bias |        |    |        |     |
| Prognostic factor measurement                                                     | Clear definition of the prognostic factors measured is provided (e.g imaging modality method, measurement, and timing described).           | x                     |        |    |        |     |
|                                                                                   | Specified instrument and personnel for measurement of predictive factors                                                                    | x                     |        |    |        |     |
|                                                                                   | Continuous variables are reported or appropriate (i.e. not data- dependent) cut-off points are used and specified a priori                  | x                     |        |    |        |     |
|                                                                                   | Blinding: were estimators of risk factor status and of outcomes blinded?                                                                    |                       |        | x  |        |     |
|                                                                                   | The prognostic factor(s) of interest is (are) adequately measured in study participants to sufficiently limit potential bias                | Low risk of bias      |        |    |        |     |
| Outcome measurement                                                               | Is the outcome(s) clearly defined?                                                                                                          |                       |        | x  |        |     |
|                                                                                   | The outcome measure and method used are adequately valid and reliable to limit misclassification bias                                       | Moderate risk of bias |        |    |        |     |
| Study confounding                                                                 | Do the authors address potential confounders?                                                                                               | x                     |        |    |        |     |
|                                                                                   | Important potential confounders are appropriately accounted for, limiting potential bias with respect to the prognostic factor of interest. | Low risk of bias      |        |    |        |     |
| Analysis and reporting                                                            | There is sufficient presentation of data to assess the adequacy of the analysis strategy and there is no selective reporting                |                       | x      |    |        |     |
|                                                                                   | The statistical analysis is appropriate for the study design, limiting potential for the presentation of invalid results                    | Moderate risk of bias |        |    |        |     |
| NA*: not applicable. Note: The above table was adapted from: Hayden et al., 2013. |                                                                                                                                             |                       |        |    |        |     |
| <b>Overall opinion of study quality= Moderate risk of bias</b>                    |                                                                                                                                             |                       |        |    |        |     |

First Author: Agbaje et al., 2018

ID: 6377433

| Potential Bias                                                                    | Items to be considered for assessment of potential opportunity for bias                                                                     | Yes                   | Partly | No | Unsure | NA* |
|-----------------------------------------------------------------------------------|---------------------------------------------------------------------------------------------------------------------------------------------|-----------------------|--------|----|--------|-----|
| Study population /sample selection                                                | Inclusion and exclusion criteria are adequately described [including explicit diagnostic criteria, start/finish date of recruitment]        | x                     |        |    |        |     |
|                                                                                   | Baseline study sample [i.e. individuals entering the study and their key characteristics and sampling frame are adequately described]       |                       | x      |    |        |     |
|                                                                                   | Study sample represents population of interest on key characteristics, sufficient to limit potential bias to results                        | Moderate risk of bias |        |    |        |     |
| Study attrition                                                                   | Response rate (i.e., proportion of study sample completing the study and providing outcome data) is adequate                                |                       |        |    |        | x   |
|                                                                                   | Participants lost to follow-up are adequately described for key characteristics                                                             |                       |        |    |        | x   |
|                                                                                   | Statement as to the possible effect on the results from missing data                                                                        |                       |        |    |        | x   |
|                                                                                   | Loss to follow-up is not associated with key characteristics                                                                                | Low risk of bias      |        |    |        |     |
| Prognostic factor measurement                                                     | Clear definition of the prognostic factors measured is provided (e.g. imaging modality method, measurement, and timing described).          | x                     |        |    |        |     |
|                                                                                   | Specified instrument and personnel for measurement of predictive factors                                                                    | x                     |        |    |        |     |
|                                                                                   | Continuous variables are reported or appropriate (i.e. not data- dependent) cut-off points are used and specified a priori                  | x                     |        |    |        |     |
|                                                                                   | Blinding: were estimators of risk factor status and of outcomes blinded?                                                                    |                       | x      |    |        |     |
|                                                                                   | The prognostic factor(s) of interest is (are) adequately measured in study participants to sufficiently limit potential bias                | Low risk of bias      |        |    |        |     |
| Outcome measurement                                                               | Is the outcome(s) clearly defined?                                                                                                          |                       | x      |    |        |     |
|                                                                                   | The outcome measure and method used are adequately valid and reliable to limit misclassification bias                                       | Moderate risk of bias |        |    |        |     |
| Study confounding                                                                 | Do the authors address potential confounders?                                                                                               |                       | x      |    |        |     |
|                                                                                   | Important potential confounders are appropriately accounted for, limiting potential bias with respect to the prognostic factor of interest. | Moderate risk of bias |        |    |        |     |
| Analysis and reporting                                                            | There is sufficient presentation of data to assess the adequacy of the analysis strategy and there is no selective reporting                |                       | x      |    |        |     |
|                                                                                   | The statistical analysis is appropriate for the study design, limiting potential for the presentation of invalid results                    | Moderate risk of bias |        |    |        |     |
| NA*: not applicable. Note: The above table was adapted from: Hayden et al., 2013. |                                                                                                                                             |                       |        |    |        |     |
| <b>Overall opinion of study quality= Moderate risk of bias</b>                    |                                                                                                                                             |                       |        |    |        |     |

First Author: Alanwar et al., 2018

ID: 6377464

| Potential Bias                                                                    | Items to be considered for assessment of potential opportunity for bias                                                                     | Yes              | Partly | No | Unsure | NA* |
|-----------------------------------------------------------------------------------|---------------------------------------------------------------------------------------------------------------------------------------------|------------------|--------|----|--------|-----|
| Study population /sample selection                                                | Inclusion and exclusion criteria are adequately described [including explicit diagnostic criteria, start/finish date of recruitment]        | x                |        |    |        |     |
|                                                                                   | Baseline study sample [i.e. individuals entering the study and their key characteristics and sampling frame are adequately described]       | x                |        |    |        |     |
|                                                                                   | Study sample represents population of interest on key characteristics, sufficient to limit potential bias to results                        | Low risk of bias |        |    |        |     |
| Study attrition                                                                   | Response rate (i.e., proportion of study sample completing the study and providing outcome data) is adequate                                |                  |        |    |        | x   |
|                                                                                   | Participants lost to follow-up are adequately described for key characteristics                                                             |                  |        |    |        | x   |
|                                                                                   | Statement as to the possible effect on the results from missing data                                                                        |                  |        |    |        | x   |
|                                                                                   | Loss to follow-up is not associated with key characteristics                                                                                | Low risk of bias |        |    |        |     |
| Prognostic factor measurement                                                     | Clear definition of the prognostic factors measured is provided (e.g. imaging modality method, measurement, and timing described).          | x                |        |    |        |     |
|                                                                                   | Specified instrument and personnel for measurement of predictive factors                                                                    | x                |        |    |        |     |
|                                                                                   | Continuous variables are reported or appropriate (i.e. not data- dependent) cut-off points are used and specified a priori                  | x                |        |    |        |     |
|                                                                                   | Blinding: were estimators of risk factor status and of outcomes blinded?                                                                    |                  |        |    | x      |     |
|                                                                                   | The prognostic factor(s) of interest is (are) adequately measured in study participants to sufficiently limit potential bias                | Low risk of bias |        |    |        |     |
| Outcome measurement                                                               | Is the outcome(s) clearly defined?                                                                                                          | x                |        |    |        |     |
|                                                                                   | The outcome measure and method used are adequately valid and reliable to limit misclassification bias                                       | Low risk of bias |        |    |        |     |
| Study confounding                                                                 | Do the authors address potential confounders?                                                                                               | x                |        |    |        |     |
|                                                                                   | Important potential confounders are appropriately accounted for, limiting potential bias with respect to the prognostic factor of interest. | Low risk of bias |        |    |        |     |
| Analysis and reporting                                                            | There is sufficient presentation of data to assess the adequacy of the analysis strategy and there is no selective reporting                | x                |        |    |        |     |
|                                                                                   | The statistical analysis is appropriate for the study design, limiting potential for the presentation of invalid results                    | Low risk of bias |        |    |        |     |
| NA*: not applicable. Note: The above table was adapted from: Hayden et al., 2013. |                                                                                                                                             |                  |        |    |        |     |
| <b>Overall opinion of study quality= Low risk of bias</b>                         |                                                                                                                                             |                  |        |    |        |     |

First Author: Allam et al., 2013

ID: 6377480

| Potential Bias                                                                    | Items to be considered for assessment of potential opportunity for bias                                                                     | Yes                   | Partly | No | Unsure | NA* |
|-----------------------------------------------------------------------------------|---------------------------------------------------------------------------------------------------------------------------------------------|-----------------------|--------|----|--------|-----|
| Study population /sample selection                                                | Inclusion and exclusion criteria are adequately described [including explicit diagnostic criteria, start/finish date of recruitment]        |                       | x      |    |        |     |
|                                                                                   | Baseline study sample [i.e. individuals entering the study and their key characteristics and sampling frame are adequately described]       | x                     |        |    |        |     |
|                                                                                   | Study sample represents population of interest on key characteristics, sufficient to limit potential bias to results                        | Low risk of bias      |        |    |        |     |
| Study attrition                                                                   | Response rate (i.e., proportion of study sample completing the study and providing outcome data) is adequate                                | x                     |        |    |        |     |
|                                                                                   | Participants lost to follow-up are adequately described for key characteristics                                                             |                       |        |    | x      |     |
|                                                                                   | Statement as to the possible effect on the results from missing data                                                                        |                       |        |    |        | x   |
|                                                                                   | Loss to follow-up is not associated with key characteristics                                                                                | Low risk of bias      |        |    |        |     |
| Prognostic factor measurement                                                     | Clear definition of the prognostic factors measured is provided (e.g. imaging modality method, measurement, and timing described).          | x                     |        |    |        |     |
|                                                                                   | Specified instrument and personnel for measurement of predictive factors                                                                    | x                     |        |    |        |     |
|                                                                                   | Continuous variables are reported or appropriate (i.e. not data- dependent) cut-off points are used and specified a priori                  | x                     |        |    |        |     |
|                                                                                   | Blinding: were estimators of risk factor status and of outcomes blinded?                                                                    |                       |        |    | x      |     |
|                                                                                   | The prognostic factor(s) of interest is (are) adequately measured in study participants to sufficiently limit potential bias                | Low risk of bias      |        |    |        |     |
| Outcome measurement                                                               | Is the outcome(s) clearly defined?                                                                                                          | x                     |        |    |        |     |
|                                                                                   | The outcome measure and method used are adequately valid and reliable to limit misclassification bias                                       | Low risk of bias      |        |    |        |     |
| Study confounding                                                                 | Do the authors address potential confounders?                                                                                               |                       | x      |    |        |     |
|                                                                                   | Important potential confounders are appropriately accounted for, limiting potential bias with respect to the prognostic factor of interest. | Moderate risk of bias |        |    |        |     |
| Analysis and reporting                                                            | There is sufficient presentation of data to assess the adequacy of the analysis strategy and there is no selective reporting                |                       | x      |    |        |     |
|                                                                                   | The statistical analysis is appropriate for the study design, limiting potential for the presentation of invalid results                    | Moderate risk of bias |        |    |        |     |
| NA*: not applicable. Note: The above table was adapted from: Hayden et al., 2013. |                                                                                                                                             |                       |        |    |        |     |
| <b>Overall opinion of study quality= Low risk of bias</b>                         |                                                                                                                                             |                       |        |    |        |     |

First Author: Anshul et al., 2010

ID: 6377837

| Potential Bias                                                                    | Items to be considered for assessment of potential opportunity for bias                                                                     | Yes                   | Partly | No | Unsure | NA* |
|-----------------------------------------------------------------------------------|---------------------------------------------------------------------------------------------------------------------------------------------|-----------------------|--------|----|--------|-----|
| Study population /sample selection                                                | Inclusion and exclusion criteria are adequately described [including explicit diagnostic criteria, start/finish date of recruitment]        | x                     |        |    |        |     |
|                                                                                   | Baseline study sample [i.e. individuals entering the study and their key characteristics and sampling frame are adequately described]       | x                     |        |    |        |     |
|                                                                                   | Study sample represents population of interest on key characteristics, sufficient to limit potential bias to results                        | Low risk of bias      |        |    |        |     |
| Study attrition                                                                   | Response rate (i.e., proportion of study sample completing the study and providing outcome data) is adequate                                |                       |        |    | x      |     |
|                                                                                   | Participants lost to follow-up are adequately described for key characteristics                                                             |                       |        |    | x      |     |
|                                                                                   | Statement as to the possible effect on the results from missing data                                                                        |                       |        |    | x      |     |
|                                                                                   | Loss to follow-up is not associated with key characteristics                                                                                | High risk of bias     |        |    |        |     |
| Prognostic factor measurement                                                     | Clear definition of the prognostic factors measured is provided (e.g. imaging modality method, measurement, and timing described).          |                       | x      |    |        |     |
|                                                                                   | Specified instrument and personnel for measurement of predictive factors                                                                    |                       |        | x  |        |     |
|                                                                                   | Continuous variables are reported or appropriate (i.e. not data- dependent) cut-off points are used and specified a priori                  | x                     |        |    |        |     |
|                                                                                   | Blinding: were estimators of risk factor status and of outcomes blinded?                                                                    |                       |        |    |        | x   |
|                                                                                   | The prognostic factor(s) of interest is (are) adequately measured in study participants to sufficiently limit potential bias                | Moderate risk of bias |        |    |        |     |
| Outcome measurement                                                               | Is the outcome(s) clearly defined?                                                                                                          |                       |        | x  |        |     |
|                                                                                   | The outcome measure and method used are adequately valid and reliable to limit misclassification bias                                       | High risk of bias     |        |    |        |     |
| Study confounding                                                                 | Do the authors address potential confounders?                                                                                               | x                     |        |    |        |     |
|                                                                                   | Important potential confounders are appropriately accounted for, limiting potential bias with respect to the prognostic factor of interest. | Low risk of bias      |        |    |        |     |
| Analysis and reporting                                                            | There is sufficient presentation of data to assess the adequacy of the analysis strategy and there is no selective reporting                |                       |        | x  |        |     |
|                                                                                   | The statistical analysis is appropriate for the study design, limiting potential for the presentation of invalid results                    | High risk of bias     |        |    |        |     |
| NA*: not applicable. Note: The above table was adapted from: Hayden et al., 2013. |                                                                                                                                             |                       |        |    |        |     |
| <b>Overall opinion of study quality= High risk of bias</b>                        |                                                                                                                                             |                       |        |    |        |     |

First Author: Bano et al., 2010

ID: 74903018

| Potential Bias                                                                    | Items to be considered for assessment of potential opportunity for bias                                                                     | Yes                   | Partly | No | Unsure | NA* |
|-----------------------------------------------------------------------------------|---------------------------------------------------------------------------------------------------------------------------------------------|-----------------------|--------|----|--------|-----|
| Study population /sample selection                                                | Inclusion and exclusion criteria are adequately described [including explicit diagnostic criteria, start/finish date of recruitment]        |                       | x      |    |        |     |
|                                                                                   | Baseline study sample [i.e. individuals entering the study and their key characteristics and sampling frame are adequately described]       |                       |        | x  |        |     |
|                                                                                   | Study sample represents population of interest on key characteristics, sufficient to limit potential bias to results                        | Moderate risk of bias |        |    |        |     |
| Study attrition                                                                   | Response rate (i.e., proportion of study sample completing the study and providing outcome data) is adequate                                |                       |        |    |        | x   |
|                                                                                   | Participants lost to follow-up are adequately described for key characteristics                                                             |                       |        |    |        | x   |
|                                                                                   | Statement as to the possible effect on the results from missing data                                                                        |                       |        |    |        | x   |
|                                                                                   | Loss to follow-up is not associated with key characteristics                                                                                | Low risk of bias      |        |    |        |     |
| Prognostic factor measurement                                                     | Clear definition of the prognostic factors measured is provided (e.g. imaging modality method, measurement, and timing described).          | x                     |        |    |        |     |
|                                                                                   | Specified instrument and personnel for measurement of predictive factors                                                                    |                       |        | x  |        |     |
|                                                                                   | Continuous variables are reported or appropriate (i.e. not data- dependent) cut-off points are used and specified a priori                  | x                     |        |    |        |     |
|                                                                                   | Blinding: were estimators of risk factor status and of outcomes blinded?                                                                    |                       |        | x  |        |     |
|                                                                                   | The prognostic factor(s) of interest is (are) adequately measured in study participants to sufficiently limit potential bias                | Moderate risk of bias |        |    |        |     |
| Outcome measurement                                                               | Is the outcome(s) clearly defined?                                                                                                          |                       |        | x  |        |     |
|                                                                                   | The outcome measure and method used are adequately valid and reliable to limit misclassification bias                                       | High risk of bias     |        |    |        |     |
| Study confounding                                                                 | Do the authors address potential confounders?                                                                                               |                       |        | x  |        |     |
|                                                                                   | Important potential confounders are appropriately accounted for, limiting potential bias with respect to the prognostic factor of interest. | High risk of bias     |        |    |        |     |
| Analysis and reporting                                                            | There is sufficient presentation of data to assess the adequacy of the analysis strategy and there is no selective reporting                |                       | x      |    |        |     |
|                                                                                   | The statistical analysis is appropriate for the study design, limiting potential for the presentation of invalid results                    | Moderate risk of bias |        |    |        |     |
| NA*: not applicable. Note: The above table was adapted from: Hayden et al., 2013. |                                                                                                                                             |                       |        |    |        |     |
| <b>Overall opinion of study quality= high risk of bias</b>                        |                                                                                                                                             |                       |        |    |        |     |

First Author: Dhand et al., 2011

ID: 6379383

| Potential Bias                                                                    | Items to be considered for assessment of potential opportunity for bias                                                                     | Yes                   | Partly | No | Unsure | NA* |
|-----------------------------------------------------------------------------------|---------------------------------------------------------------------------------------------------------------------------------------------|-----------------------|--------|----|--------|-----|
| Study population /sample selection                                                | Inclusion and exclusion criteria are adequately described [including explicit diagnostic criteria, start/finish date of recruitment]        | x                     |        |    |        |     |
|                                                                                   | Baseline study sample [i.e. individuals entering the study and their key characteristics and sampling frame are adequately described]       | x                     |        |    |        |     |
|                                                                                   | Study sample represents population of interest on key characteristics, sufficient to limit potential bias to results                        | Low risk of bias      |        |    |        |     |
| Study attrition                                                                   | Response rate (i.e., proportion of study sample completing the study and providing outcome data) is adequate                                |                       |        |    | x      |     |
|                                                                                   | Participants lost to follow-up are adequately described for key characteristics                                                             |                       |        |    | x      |     |
|                                                                                   | Statement as to the possible effect on the results from missing data                                                                        |                       |        |    | x      |     |
|                                                                                   | Loss to follow-up is not associated with key characteristics                                                                                | Moderate risk of bias |        |    |        |     |
| Prognostic factor measurement                                                     | Clear definition of the prognostic factors measured is provided (e.g. imaging modality method, measurement, and timing described).          |                       | x      |    |        |     |
|                                                                                   | Specified instrument and personnel for measurement of predictive factors                                                                    |                       | x      |    |        |     |
|                                                                                   | Continuous variables are reported or appropriate (i.e. not data- dependent) cut-off points are used and specified a priori                  |                       | x      |    |        |     |
|                                                                                   | Blinding: were estimators of risk factor status and of outcomes blinded?                                                                    |                       |        |    | x      |     |
|                                                                                   | The prognostic factor(s) of interest is (are) adequately measured in study participants to sufficiently limit potential bias                | High risk of bias     |        |    |        |     |
| Outcome measurement                                                               | Is the outcome(s) clearly defined?                                                                                                          |                       |        | x  |        |     |
|                                                                                   | The outcome measure and method used are adequately valid and reliable to limit misclassification bias                                       | High risk of bias     |        |    |        |     |
| Study confounding                                                                 | Do the authors address potential confounders?                                                                                               | x                     |        |    |        |     |
|                                                                                   | Important potential confounders are appropriately accounted for, limiting potential bias with respect to the prognostic factor of interest. | Low risk of bias      |        |    |        |     |
| Analysis and reporting                                                            | There is sufficient presentation of data to assess the adequacy of the analysis strategy and there is no selective reporting                |                       |        | x  |        |     |
|                                                                                   | The statistical analysis is appropriate for the study design, limiting potential for the presentation of invalid results                    | High risk of bias     |        |    |        |     |
| NA*: not applicable. Note: The above table was adapted from: Hayden et al., 2013. |                                                                                                                                             |                       |        |    |        |     |
| <b>Overall opinion of study quality= High risk of bias</b>                        |                                                                                                                                             |                       |        |    |        |     |

First Author: Dorman et al., 2002

ID: 6377862

| Potential Bias                                                                    | Items to be considered for assessment of potential opportunity for bias                                                                     | Yes              | Partly | No | Unsure | NA* |
|-----------------------------------------------------------------------------------|---------------------------------------------------------------------------------------------------------------------------------------------|------------------|--------|----|--------|-----|
| Study population /sample selection                                                | Inclusion and exclusion criteria are adequately described [including explicit diagnostic criteria, start/finish date of recruitment]        | x                |        |    |        |     |
|                                                                                   | Baseline study sample [i.e. individuals entering the study and their key characteristics and sampling frame are adequately described]       | x                |        |    |        |     |
|                                                                                   | Study sample represents population of interest on key characteristics, sufficient to limit potential bias to results                        | Low risk of bias |        |    |        |     |
| Study attrition                                                                   | Response rate (i.e., proportion of study sample completing the study and providing outcome data) is adequate                                | x                |        |    |        |     |
|                                                                                   | Participants lost to follow-up are adequately described for key characteristics                                                             | x                |        |    |        |     |
|                                                                                   | Statement as to the possible effect on the results from missing data                                                                        | x                |        |    |        |     |
|                                                                                   | Loss to follow-up is not associated with key characteristics                                                                                | Low risk of bias |        |    |        |     |
| Prognostic factor measurement                                                     | Clear definition of the prognostic factors measured is provided (e.g. imaging modality method, measurement, and timing described).          | x                |        |    |        |     |
|                                                                                   | Specified instrument and personnel for measurement of predictive factors                                                                    | x                |        |    |        |     |
|                                                                                   | Continuous variables are reported or appropriate (i.e. not data- dependent) cut-off points are used and specified a priori                  | x                |        |    |        |     |
|                                                                                   | Blinding: were estimators of risk factor status and of outcomes blinded?                                                                    | x                |        |    |        |     |
|                                                                                   | The prognostic factor(s) of interest is (are) adequately measured in study participants to sufficiently limit potential bias                | Low risk of bias |        |    |        |     |
| Outcome measurement                                                               | Is the outcome(s) clearly defined?                                                                                                          | x                |        |    |        |     |
|                                                                                   | The outcome measure and method used are adequately valid and reliable to limit misclassification bias                                       | Low risk of bias |        |    |        |     |
| Study confounding                                                                 | Do the authors address potential confounders?                                                                                               | x                |        |    |        |     |
|                                                                                   | Important potential confounders are appropriately accounted for, limiting potential bias with respect to the prognostic factor of interest. | Low risk of bias |        |    |        |     |
| Analysis and reporting                                                            | There is sufficient presentation of data to assess the adequacy of the analysis strategy and there is no selective reporting                | x                |        |    |        |     |
|                                                                                   | The statistical analysis is appropriate for the study design, limiting potential for the presentation of invalid results                    | Low risk of bias |        |    |        |     |
| NA*: not applicable. Note: The above table was adapted from: Hayden et al., 2013. |                                                                                                                                             |                  |        |    |        |     |
| <b>Overall opinion of study quality= Low risk of bias</b>                         |                                                                                                                                             |                  |        |    |        |     |



First Author: Ebrashy et al., 2005

ID: 6377887

| Potential Bias                                                                    | Items to be considered for assessment of potential opportunity for bias                                                                     | Yes                   | Partly | No | Unsure | NA* |
|-----------------------------------------------------------------------------------|---------------------------------------------------------------------------------------------------------------------------------------------|-----------------------|--------|----|--------|-----|
| Study population /sample selection                                                | Inclusion and exclusion criteria are adequately described [including explicit diagnostic criteria, start/finish date of recruitment]        | x                     |        |    |        |     |
|                                                                                   | Baseline study sample [i.e. individuals entering the study and their key characteristics and sampling frame are adequately described]       | x                     |        |    |        |     |
|                                                                                   | Study sample represents population of interest on key characteristics, sufficient to limit potential bias to results                        | Low risk of bias      |        |    |        |     |
| Study attrition                                                                   | Response rate (i.e., proportion of study sample completing the study and providing outcome data) is adequate                                | x                     |        |    |        |     |
|                                                                                   | Participants lost to follow-up are adequately described for key characteristics                                                             | x                     |        |    |        |     |
|                                                                                   | Statement as to the possible effect on the results from missing data                                                                        |                       |        |    |        | x   |
|                                                                                   | Loss to follow-up is not associated with key characteristics                                                                                | Low risk of bias      |        |    |        |     |
| Prognostic factor measurement                                                     | Clear definition of the prognostic factors measured is provided (e.g. imaging modality method, measurement, and timing described).          | x                     |        |    |        |     |
|                                                                                   | Specified instrument and personnel for measurement of predictive factors                                                                    | x                     |        |    |        |     |
|                                                                                   | Continuous variables are reported or appropriate (i.e. not data- dependent) cut-off points are used and specified a priori                  | x                     |        |    |        |     |
|                                                                                   | Blinding: were estimators of risk factor status and of outcomes blinded?                                                                    | x                     |        |    |        |     |
|                                                                                   | The prognostic factor(s) of interest is (are) adequately measured in study participants to sufficiently limit potential bias                | Low risk of bias      |        |    |        |     |
| Outcome measurement                                                               | Is the outcome(s) clearly defined?                                                                                                          | x                     |        |    |        |     |
|                                                                                   | The outcome measure and method used are adequately valid and reliable to limit misclassification bias                                       | Low risk of bias      |        |    |        |     |
| Study confounding                                                                 | Do the authors address potential confounders?                                                                                               | x                     |        |    |        |     |
|                                                                                   | Important potential confounders are appropriately accounted for, limiting potential bias with respect to the prognostic factor of interest. | Low risk of bias      |        |    |        |     |
| Analysis and reporting                                                            | There is sufficient presentation of data to assess the adequacy of the analysis strategy and there is no selective reporting                |                       | x      |    |        |     |
|                                                                                   | The statistical analysis is appropriate for the study design, limiting potential for the presentation of invalid results                    | Moderate risk of bias |        |    |        |     |
| NA*: not applicable. Note: The above table was adapted from: Hayden et al., 2013. |                                                                                                                                             |                       |        |    |        |     |
| <b>Overall opinion of study quality= Low risk of bias</b>                         |                                                                                                                                             |                       |        |    |        |     |

First Author: Geerts et al., 2007

ID: 6378017

| Potential Bias                                                                    | Items to be considered for assessment of potential opportunity for bias                                                                     | Yes                   | Partly | No | Unsure | NA* |
|-----------------------------------------------------------------------------------|---------------------------------------------------------------------------------------------------------------------------------------------|-----------------------|--------|----|--------|-----|
| Study population /sample selection                                                | Inclusion and exclusion criteria are adequately described [including explicit diagnostic criteria, start/finish date of recruitment]        | x                     |        |    |        |     |
|                                                                                   | Baseline study sample [i.e. individuals entering the study and their key characteristics and sampling frame are adequately described]       | x                     |        |    |        |     |
|                                                                                   | Study sample represents population of interest on key characteristics, sufficient to limit potential bias to results                        | Low risk of bias      |        |    |        |     |
| Study attrition                                                                   | Response rate (i.e., proportion of study sample completing the study and providing outcome data) is adequate                                | x                     |        |    |        |     |
|                                                                                   | Participants lost to follow-up are adequately described for key characteristics                                                             |                       |        |    |        | x   |
|                                                                                   | Statement as to the possible effect on the results from missing data                                                                        |                       |        |    |        | x   |
|                                                                                   | Loss to follow-up is not associated with key characteristics                                                                                | Low risk of bias      |        |    |        |     |
| Prognostic factor measurement                                                     | Clear definition of the prognostic factors measured is provided (e.g. imaging modality method, measurement, and timing described).          |                       | x      |    |        |     |
|                                                                                   | Specified instrument and personnel for measurement of predictive factors                                                                    | x                     |        |    |        |     |
|                                                                                   | Continuous variables are reported or appropriate (i.e. not data- dependent) cut-off points are used and specified a priori                  | x                     |        |    |        |     |
|                                                                                   | Blinding: were estimators of risk factor status and of outcomes blinded?                                                                    | x                     |        |    |        |     |
|                                                                                   | The prognostic factor(s) of interest is (are) adequately measured in study participants to sufficiently limit potential bias                | Low risk of bias      |        |    |        |     |
| Outcome measurement                                                               | Is the outcome(s) clearly defined?                                                                                                          |                       | x      |    |        |     |
|                                                                                   | The outcome measure and method used are adequately valid and reliable to limit misclassification bias                                       | Moderate risk of bias |        |    |        |     |
| Study confounding                                                                 | Do the authors address potential confounders?                                                                                               |                       | x      |    |        |     |
|                                                                                   | Important potential confounders are appropriately accounted for, limiting potential bias with respect to the prognostic factor of interest. | Moderate risk of bias |        |    |        |     |
| Analysis and reporting                                                            | There is sufficient presentation of data to assess the adequacy of the analysis strategy and there is no selective reporting                | x                     |        |    |        |     |
|                                                                                   | The statistical analysis is appropriate for the study design, limiting potential for the presentation of invalid results                    | Low risk of bias      |        |    |        |     |
| NA*: not applicable. Note: The above table was adapted from: Hayden et al., 2013. |                                                                                                                                             |                       |        |    |        |     |
| <b>Overall opinion of study quality= Low risk of bias</b>                         |                                                                                                                                             |                       |        |    |        |     |

First Author: Khanduri et al., 2013

ID: 6378321

| Potential Bias                                                                    | Items to be considered for assessment of potential opportunity for bias                                                                     | Yes                   | Partly | No | Unsure | NA* |
|-----------------------------------------------------------------------------------|---------------------------------------------------------------------------------------------------------------------------------------------|-----------------------|--------|----|--------|-----|
| Study population /sample selection                                                | Inclusion and exclusion criteria are adequately described [including explicit diagnostic criteria, start/finish date of recruitment]        | x                     |        |    |        |     |
|                                                                                   | Baseline study sample [i.e. individuals entering the study and their key characteristics and sampling frame are adequately described]       | x                     |        |    |        |     |
|                                                                                   | Study sample represents population of interest on key characteristics, sufficient to limit potential bias to results                        | Low risk of bias      |        |    |        |     |
| Study attrition                                                                   | Response rate (i.e., proportion of study sample completing the study and providing outcome data) is adequate                                | x                     |        |    |        |     |
|                                                                                   | Participants lost to follow-up are adequately described for key characteristics                                                             | x                     |        |    |        |     |
|                                                                                   | Statement as to the possible effect on the results from missing data                                                                        |                       |        |    |        | x   |
|                                                                                   | Loss to follow-up is not associated with key characteristics                                                                                | Low risk of bias      |        |    |        |     |
| Prognostic factor measurement                                                     | Clear definition of the prognostic factors measured is provided (e.g. imaging modality method, measurement, and timing described).          | x                     |        |    |        |     |
|                                                                                   | Specified instrument and personnel for measurement of predictive factors                                                                    | x                     |        |    |        |     |
|                                                                                   | Continuous variables are reported or appropriate (i.e. not data- dependent) cut-off points are used and specified a priori                  | x                     |        |    |        |     |
|                                                                                   | Blinding: were estimators of risk factor status and of outcomes blinded?                                                                    |                       | x      |    |        |     |
|                                                                                   | The prognostic factor(s) of interest is (are) adequately measured in study participants to sufficiently limit potential bias                | Low risk of bias      |        |    |        |     |
| Outcome measurement                                                               | Is the outcome(s) clearly defined?                                                                                                          |                       | x      |    |        |     |
|                                                                                   | The outcome measure and method used are adequately valid and reliable to limit misclassification bias                                       | Moderate risk of bias |        |    |        |     |
| Study confounding                                                                 | Do the authors address potential confounders?                                                                                               | x                     |        |    |        |     |
|                                                                                   | Important potential confounders are appropriately accounted for, limiting potential bias with respect to the prognostic factor of interest. | Low risk of bias      |        |    |        |     |
| Analysis and reporting                                                            | There is sufficient presentation of data to assess the adequacy of the analysis strategy and there is no selective reporting                |                       | x      |    |        |     |
|                                                                                   | The statistical analysis is appropriate for the study design, limiting potential for the presentation of invalid results                    | Moderate risk of bias |        |    |        |     |
| NA*: not applicable. Note: The above table was adapted from: Hayden et al., 2013. |                                                                                                                                             |                       |        |    |        |     |
| <b>Overall opinion of study quality= Low risk of bias</b>                         |                                                                                                                                             |                       |        |    |        |     |

First Author: Kumari et al., 2019

ID: 68614385

| Potential Bias                                                                    | Items to be considered for assessment of potential opportunity for bias                                                                     | Yes                   | Partly | No | Unsure | NA* |
|-----------------------------------------------------------------------------------|---------------------------------------------------------------------------------------------------------------------------------------------|-----------------------|--------|----|--------|-----|
| Study population /sample selection                                                | Inclusion and exclusion criteria are adequately described [including explicit diagnostic criteria, start/finish date of recruitment]        |                       | x      |    |        |     |
|                                                                                   | Baseline study sample [i.e. individuals entering the study and their key characteristics and sampling frame are adequately described]       |                       | x      |    |        |     |
|                                                                                   | Study sample represents population of interest on key characteristics, sufficient to limit potential bias to results                        | Moderate risk of bias |        |    |        |     |
| Study attrition                                                                   | Response rate (i.e., proportion of study sample completing the study and providing outcome data) is adequate                                |                       |        |    | x      |     |
|                                                                                   | Participants lost to follow-up are adequately described for key characteristics                                                             |                       |        |    | x      |     |
|                                                                                   | Statement as to the possible effect on the results from missing data                                                                        |                       |        |    | x      |     |
|                                                                                   | Loss to follow-up is not associated with key characteristics                                                                                | Moderate risk of bias |        |    |        |     |
| Prognostic factor measurement                                                     | Clear definition of the prognostic factors measured is provided (e.g. imaging modality method, measurement, and timing described).          | x                     |        |    |        |     |
|                                                                                   | Specified instrument and personnel for measurement of predictive factors                                                                    | x                     |        |    |        |     |
|                                                                                   | Continuous variables are reported or appropriate (i.e. not data- dependent) cut-off points are used and specified a priori                  | x                     |        |    |        |     |
|                                                                                   | Blinding: were estimators of risk factor status and of outcomes blinded?                                                                    |                       |        | x  |        |     |
|                                                                                   | The prognostic factor(s) of interest is (are) adequately measured in study participants to sufficiently limit potential bias                | Low risk of bias      |        |    |        |     |
| Outcome measurement                                                               | Is the outcome(s) clearly defined?                                                                                                          |                       | x      |    |        |     |
|                                                                                   | The outcome measure and method used are adequately valid and reliable to limit misclassification bias                                       | Moderate risk of bias |        |    |        |     |
| Study confounding                                                                 | Do the authors address potential confounders?                                                                                               | x                     |        |    |        |     |
|                                                                                   | Important potential confounders are appropriately accounted for, limiting potential bias with respect to the prognostic factor of interest. | Low risk of bias      |        |    |        |     |
| Analysis and reporting                                                            | There is sufficient presentation of data to assess the adequacy of the analysis strategy and there is no selective reporting                | x                     |        |    |        |     |
|                                                                                   | The statistical analysis is appropriate for the study design, limiting potential for the presentation of invalid results                    | Low risk of bias      |        |    |        |     |
| NA*: not applicable. Note: The above table was adapted from: Hayden et al., 2013. |                                                                                                                                             |                       |        |    |        |     |
| <b>Overall opinion of study quality= Moderate risk of bias</b>                    |                                                                                                                                             |                       |        |    |        |     |

First Author: Lakhkar et al., 2006

ID: 74903014

| Potential Bias                                                                    | Items to be considered for assessment of potential opportunity for bias                                                                     | Yes                   | Partly | No | Unsure | NA* |
|-----------------------------------------------------------------------------------|---------------------------------------------------------------------------------------------------------------------------------------------|-----------------------|--------|----|--------|-----|
| Study population /sample selection                                                | Inclusion and exclusion criteria are adequately described [including explicit diagnostic criteria, start/finish date of recruitment]        |                       | x      |    |        |     |
|                                                                                   | Baseline study sample [i.e. individuals entering the study and their key characteristics and sampling frame are adequately described]       | x                     |        |    |        |     |
|                                                                                   | Study sample represents population of interest on key characteristics, sufficient to limit potential bias to results                        | Moderate risk of bias |        |    |        |     |
| Study attrition                                                                   | Response rate (i.e., proportion of study sample completing the study and providing outcome data) is adequate                                |                       |        |    |        | x   |
|                                                                                   | Participants lost to follow-up are adequately described for key characteristics                                                             |                       |        |    |        | x   |
|                                                                                   | Statement as to the possible effect on the results from missing data                                                                        |                       |        |    |        | x   |
|                                                                                   | Loss to follow-up is not associated with key characteristics                                                                                | Low risk of bias      |        |    |        |     |
| Prognostic factor measurement                                                     | Clear definition of the prognostic factors measured is provided (e.g. imaging modality method, measurement, and timing described).          | x                     |        |    |        |     |
|                                                                                   | Specified instrument and personnel for measurement of predictive factors                                                                    |                       | x      |    |        |     |
|                                                                                   | Continuous variables are reported or appropriate (i.e. not data- dependent) cut-off points are used and specified a priori                  | x                     |        |    |        |     |
|                                                                                   | Blinding: were estimators of risk factor status and of outcomes blinded?                                                                    |                       |        | x  |        |     |
|                                                                                   | The prognostic factor(s) of interest is (are) adequately measured in study participants to sufficiently limit potential bias                | Moderate risk of bias |        |    |        |     |
| Outcome measurement                                                               | Is the outcome(s) clearly defined?                                                                                                          | x                     |        |    |        |     |
|                                                                                   | The outcome measure and method used are adequately valid and reliable to limit misclassification bias                                       | Low risk of bias      |        |    |        |     |
| Study confounding                                                                 | Do the authors address potential confounders?                                                                                               | x                     |        |    |        |     |
|                                                                                   | Important potential confounders are appropriately accounted for, limiting potential bias with respect to the prognostic factor of interest. | Low risk of bias      |        |    |        |     |
| Analysis and reporting                                                            | There is sufficient presentation of data to assess the adequacy of the analysis strategy and there is no selective reporting                |                       | x      |    |        |     |
|                                                                                   | The statistical analysis is appropriate for the study design, limiting potential for the presentation of invalid results                    | Moderate risk of bias |        |    |        |     |
| NA*: not applicable. Note: The above table was adapted from: Hayden et al., 2013. |                                                                                                                                             |                       |        |    |        |     |
| <b>Overall opinion of study quality= Moderate risk of bias</b>                    |                                                                                                                                             |                       |        |    |        |     |

First Author: Lakshmi et al., 2013

ID: 6378401

| Potential Bias                                                                    | Items to be considered for assessment of potential opportunity for bias                                                                     | Yes                   | Partly | No | Unsure | NA* |
|-----------------------------------------------------------------------------------|---------------------------------------------------------------------------------------------------------------------------------------------|-----------------------|--------|----|--------|-----|
| Study population /sample selection                                                | Inclusion and exclusion criteria are adequately described [including explicit diagnostic criteria, start/finish date of recruitment]        | x                     |        |    |        |     |
|                                                                                   | Baseline study sample [i.e. individuals entering the study and their key characteristics and sampling frame are adequately described]       | x                     |        |    |        |     |
|                                                                                   | Study sample represents population of interest on key characteristics, sufficient to limit potential bias to results                        | Low risk of bias      |        |    |        |     |
| Study attrition                                                                   | Response rate (i.e., proportion of study sample completing the study and providing outcome data) is adequate                                | x                     |        |    |        |     |
|                                                                                   | Participants lost to follow-up are adequately described for key characteristics                                                             | x                     |        |    |        |     |
|                                                                                   | Statement as to the possible effect on the results from missing data                                                                        |                       |        | x  |        |     |
|                                                                                   | Loss to follow-up is not associated with key characteristics                                                                                | Low risk of bias      |        |    |        |     |
| Prognostic factor measurement                                                     | Clear definition of the prognostic factors measured is provided (e.g. imaging modality method, measurement, and timing described).          | x                     |        |    |        |     |
|                                                                                   | Specified instrument and personnel for measurement of predictive factors                                                                    | x                     |        |    |        |     |
|                                                                                   | Continuous variables are reported or appropriate (i.e. not data- dependent) cut-off points are used and specified a priori                  | x                     |        |    |        |     |
|                                                                                   | Blinding: were estimators of risk factor status and of outcomes blinded?                                                                    | x                     |        |    |        |     |
|                                                                                   | The prognostic factor(s) of interest is (are) adequately measured in study participants to sufficiently limit potential bias                | Low risk of bias      |        |    |        |     |
| Outcome measurement                                                               | Is the outcome(s) clearly defined?                                                                                                          | x                     |        |    |        |     |
|                                                                                   | The outcome measure and method used are adequately valid and reliable to limit misclassification bias                                       | Low risk of bias      |        |    |        |     |
| Study confounding                                                                 | Do the authors address potential confounders?                                                                                               | x                     |        |    |        |     |
|                                                                                   | Important potential confounders are appropriately accounted for, limiting potential bias with respect to the prognostic factor of interest. | Low risk of bias      |        |    |        |     |
| Analysis and reporting                                                            | There is sufficient presentation of data to assess the adequacy of the analysis strategy and there is no selective reporting                |                       | x      |    |        |     |
|                                                                                   | The statistical analysis is appropriate for the study design, limiting potential for the presentation of invalid results                    | Moderate risk of bias |        |    |        |     |
| NA*: not applicable. Note: The above table was adapted from: Hayden et al., 2013. |                                                                                                                                             |                       |        |    |        |     |
| <b>Overall opinion of study quality= Low risk of bias</b>                         |                                                                                                                                             |                       |        |    |        |     |

First Author: Malik et al., 2013

ID: 6378519

| Potential Bias                                                                    | Items to be considered for assessment of potential opportunity for bias                                                                     | Yes                   | Partly | No | Unsure | NA* |
|-----------------------------------------------------------------------------------|---------------------------------------------------------------------------------------------------------------------------------------------|-----------------------|--------|----|--------|-----|
| Study population /sample selection                                                | Inclusion and exclusion criteria are adequately described [including explicit diagnostic criteria, start/finish date of recruitment]        | x                     |        |    |        |     |
|                                                                                   | Baseline study sample [i.e. individuals entering the study and their key characteristics and sampling frame are adequately described]       | x                     |        |    |        |     |
|                                                                                   | Study sample represents population of interest on key characteristics, sufficient to limit potential bias to results                        | Low risk of bias      |        |    |        |     |
| Study attrition                                                                   | Response rate (i.e., proportion of study sample completing the study and providing outcome data) is adequate                                | x                     |        |    |        |     |
|                                                                                   | Participants lost to follow-up are adequately described for key characteristics                                                             |                       |        | x  |        |     |
|                                                                                   | Statement as to the possible effect on the results from missing data                                                                        |                       |        |    | x      |     |
|                                                                                   | Loss to follow-up is not associated with key characteristics                                                                                | High risk of bias     |        |    |        |     |
| Prognostic factor measurement                                                     | Clear definition of the prognostic factors measured is provided (e.g. imaging modality method, measurement, and timing described).          |                       |        | x  |        |     |
|                                                                                   | Specified instrument and personnel for measurement of predictive factors                                                                    |                       | x      |    |        |     |
|                                                                                   | Continuous variables are reported or appropriate (i.e. not data- dependent) cut-off points are used and specified a priori                  |                       |        |    | x      |     |
|                                                                                   | Blinding: were estimators of risk factor status and of outcomes blinded?                                                                    |                       |        |    | x      |     |
|                                                                                   | The prognostic factor(s) of interest is (are) adequately measured in study participants to sufficiently limit potential bias                | High risk of bias     |        |    |        |     |
| Outcome measurement                                                               | Is the outcome(s) clearly defined?                                                                                                          |                       | x      |    |        |     |
|                                                                                   | The outcome measure and method used are adequately valid and reliable to limit misclassification bias                                       | Moderate risk of bias |        |    |        |     |
| Study confounding                                                                 | Do the authors address potential confounders?                                                                                               |                       | x      |    |        |     |
|                                                                                   | Important potential confounders are appropriately accounted for, limiting potential bias with respect to the prognostic factor of interest. | Moderate risk of bias |        |    |        |     |
| Analysis and reporting                                                            | There is sufficient presentation of data to assess the adequacy of the analysis strategy and there is no selective reporting                |                       | x      |    |        |     |
|                                                                                   | The statistical analysis is appropriate for the study design, limiting potential for the presentation of invalid results                    | Moderate risk of bias |        |    |        |     |
| NA*: not applicable. Note: The above table was adapted from: Hayden et al., 2013. |                                                                                                                                             |                       |        |    |        |     |
| <b>Overall opinion of study quality= High risk of bias</b>                        |                                                                                                                                             |                       |        |    |        |     |

First Author: Masihi et al., 2019

ID: 68614415

| Potential Bias                                                                    | Items to be considered for assessment of potential opportunity for bias                                                                     | Yes                   | Partly | No | Unsure | NA* |
|-----------------------------------------------------------------------------------|---------------------------------------------------------------------------------------------------------------------------------------------|-----------------------|--------|----|--------|-----|
| Study population /sample selection                                                | Inclusion and exclusion criteria are adequately described [including explicit diagnostic criteria, start/finish date of recruitment]        | x                     |        |    |        |     |
|                                                                                   | Baseline study sample [i.e. individuals entering the study and their key characteristics and sampling frame are adequately described]       | x                     |        |    |        |     |
|                                                                                   | Study sample represents population of interest on key characteristics, sufficient to limit potential bias to results                        | Low risk of bias      |        |    |        |     |
| Study attrition                                                                   | Response rate (i.e., proportion of study sample completing the study and providing outcome data) is adequate                                |                       |        | x  |        |     |
|                                                                                   | Participants lost to follow-up are adequately described for key characteristics                                                             |                       |        | x  |        |     |
|                                                                                   | Statement as to the possible effect on the results from missing data                                                                        |                       |        | x  |        |     |
|                                                                                   | Loss to follow-up is not associated with key characteristics                                                                                | Moderate risk of bias |        |    |        |     |
| Prognostic factor measurement                                                     | Clear definition of the prognostic factors measured is provided (e.g. imaging modality method, measurement, and timing described).          | x                     |        |    |        |     |
|                                                                                   | Specified instrument and personnel for measurement of predictive factors                                                                    |                       |        | x  |        |     |
|                                                                                   | Continuous variables are reported or appropriate (i.e. not data- dependent) cut-off points are used and specified a priori                  | x                     |        |    |        |     |
|                                                                                   | Blinding: were estimators of risk factor status and of outcomes blinded?                                                                    |                       |        | x  |        |     |
|                                                                                   | The prognostic factor(s) of interest is (are) adequately measured in study participants to sufficiently limit potential bias                | Moderate risk of bias |        |    |        |     |
| Outcome measurement                                                               | Is the outcome(s) clearly defined?                                                                                                          | x                     |        |    |        |     |
|                                                                                   | The outcome measure and method used are adequately valid and reliable to limit misclassification bias                                       | Low risk of bias      |        |    |        |     |
| Study confounding                                                                 | Do the authors address potential confounders?                                                                                               | x                     |        |    |        |     |
|                                                                                   | Important potential confounders are appropriately accounted for, limiting potential bias with respect to the prognostic factor of interest. | Low risk of bias      |        |    |        |     |
| Analysis and reporting                                                            | There is sufficient presentation of data to assess the adequacy of the analysis strategy and there is no selective reporting                | x                     |        |    |        |     |
|                                                                                   | The statistical analysis is appropriate for the study design, limiting potential for the presentation of invalid results                    | Low risk of bias      |        |    |        |     |
| NA*: not applicable. Note: The above table was adapted from: Hayden et al., 2013. |                                                                                                                                             |                       |        |    |        |     |
| <b>Overall opinion of study quality= Low risk of bias</b>                         |                                                                                                                                             |                       |        |    |        |     |



First Author: Mullick et al., 1993

ID: 6378675

| Potential Bias                                                                    | Items to be considered for assessment of potential opportunity for bias                                                                     | Yes                   | Partly | No | Unsure | NA* |
|-----------------------------------------------------------------------------------|---------------------------------------------------------------------------------------------------------------------------------------------|-----------------------|--------|----|--------|-----|
| Study population /sample selection                                                | Inclusion and exclusion criteria are adequately described [including explicit diagnostic criteria, start/finish date of recruitment]        | x                     |        |    |        |     |
|                                                                                   | Baseline study sample [i.e. individuals entering the study and their key characteristics and sampling frame are adequately described]       |                       | x      |    |        |     |
|                                                                                   | Study sample represents population of interest on key characteristics, sufficient to limit potential bias to results                        | Low risk of bias      |        |    |        |     |
| Study attrition                                                                   | Response rate (i.e., proportion of study sample completing the study and providing outcome data) is adequate                                | x                     |        |    |        |     |
|                                                                                   | Participants lost to follow-up are adequately described for key characteristics                                                             | x                     |        |    |        |     |
|                                                                                   | Statement as to the possible effect on the results from missing data                                                                        |                       |        |    |        | x   |
|                                                                                   | Loss to follow-up is not associated with key characteristics                                                                                | Low risk of bias      |        |    |        |     |
| Prognostic factor measurement                                                     | Clear definition of the prognostic factors measured is provided (e.g. imaging modality method, measurement, and timing described).          | x                     |        |    |        |     |
|                                                                                   | Specified instrument and personnel for measurement of predictive factors                                                                    |                       | x      |    |        |     |
|                                                                                   | Continuous variables are reported or appropriate (i.e. not data- dependent) cut-off points are used and specified a priori                  |                       | x      |    |        |     |
|                                                                                   | Blinding: were estimators of risk factor status and of outcomes blinded?                                                                    |                       |        |    | x      |     |
|                                                                                   | The prognostic factor(s) of interest is (are) adequately measured in study participants to sufficiently limit potential bias                | Moderate risk of bias |        |    |        |     |
| Outcome measurement                                                               | Is the outcome(s) clearly defined?                                                                                                          |                       | x      |    |        |     |
|                                                                                   | The outcome measure and method used are adequately valid and reliable to limit misclassification bias                                       | Moderate risk of bias |        |    |        |     |
| Study confounding                                                                 | Do the authors address potential confounders?                                                                                               |                       | x      |    |        |     |
|                                                                                   | Important potential confounders are appropriately accounted for, limiting potential bias with respect to the prognostic factor of interest. | Moderate risk of bias |        |    |        |     |
| Analysis and reporting                                                            | There is sufficient presentation of data to assess the adequacy of the analysis strategy and there is no selective reporting                |                       | x      |    |        |     |
|                                                                                   | The statistical analysis is appropriate for the study design, limiting potential for the presentation of invalid results                    | Moderate risk of bias |        |    |        |     |
| NA*: not applicable. Note: The above table was adapted from: Hayden et al., 2013. |                                                                                                                                             |                       |        |    |        |     |
| <b>Overall opinion of study quality= Moderate risk of bias</b>                    |                                                                                                                                             |                       |        |    |        |     |

First Author: Nagar et al., 2015

ID: 6378692

| Potential Bias                                                                    | Items to be considered for assessment of potential opportunity for bias                                                                     | Yes                   | Partly | No | Unsure | NA* |
|-----------------------------------------------------------------------------------|---------------------------------------------------------------------------------------------------------------------------------------------|-----------------------|--------|----|--------|-----|
| Study population /sample selection                                                | Inclusion and exclusion criteria are adequately described [including explicit diagnostic criteria, start/finish date of recruitment]        | x                     |        |    |        |     |
|                                                                                   | Baseline study sample [i.e. individuals entering the study and their key characteristics and sampling frame are adequately described]       |                       | x      |    |        |     |
|                                                                                   | Study sample represents population of interest on key characteristics, sufficient to limit potential bias to results                        | Low risk of bias      |        |    |        |     |
| Study attrition                                                                   | Response rate (i.e., proportion of study sample completing the study and providing outcome data) is adequate                                | x                     |        |    |        |     |
|                                                                                   | Participants lost to follow-up are adequately described for key characteristics                                                             |                       |        |    | x      |     |
|                                                                                   | Statement as to the possible effect on the results from missing data                                                                        |                       |        |    |        | x   |
|                                                                                   | Loss to follow-up is not associated with key characteristics                                                                                | Low risk of bias      |        |    |        |     |
| Prognostic factor measurement                                                     | Clear definition of the prognostic factors measured is provided (e.g. imaging modality method, measurement, and timing described).          | x                     |        |    |        |     |
|                                                                                   | Specified instrument and personnel for measurement of predictive factors                                                                    |                       |        | x  |        |     |
|                                                                                   | Continuous variables are reported or appropriate (i.e. not data- dependent) cut-off points are used and specified a priori                  | x                     |        |    |        |     |
|                                                                                   | Blinding: were estimators of risk factor status and of outcomes blinded?                                                                    |                       |        | x  |        |     |
|                                                                                   | The prognostic factor(s) of interest is (are) adequately measured in study participants to sufficiently limit potential bias                | Moderate risk of bias |        |    |        |     |
| Outcome measurement                                                               | Is the outcome(s) clearly defined?                                                                                                          |                       | x      |    |        |     |
|                                                                                   | The outcome measure and method used are adequately valid and reliable to limit misclassification bias                                       | Moderate risk of bias |        |    |        |     |
| Study confounding                                                                 | Do the authors address potential confounders?                                                                                               | x                     |        |    |        |     |
|                                                                                   | Important potential confounders are appropriately accounted for, limiting potential bias with respect to the prognostic factor of interest. | Low risk of bias      |        |    |        |     |
| Analysis and reporting                                                            | There is sufficient presentation of data to assess the adequacy of the analysis strategy and there is no selective reporting                |                       | x      |    |        |     |
|                                                                                   | The statistical analysis is appropriate for the study design, limiting potential for the presentation of invalid results                    | Moderate risk of bias |        |    |        |     |
| NA*: not applicable. Note: The above table was adapted from: Hayden et al., 2013. |                                                                                                                                             |                       |        |    |        |     |
| <b>Overall opinion of study quality= Moderate risk of bias</b>                    |                                                                                                                                             |                       |        |    |        |     |

First Author: Najam et al., 2016

ID: 6378705

| Potential Bias                                                                    | Items to be considered for assessment of potential opportunity for bias                                                                     | Yes                   | Partly | No | Unsure | NA* |
|-----------------------------------------------------------------------------------|---------------------------------------------------------------------------------------------------------------------------------------------|-----------------------|--------|----|--------|-----|
| Study population /sample selection                                                | Inclusion and exclusion criteria are adequately described [including explicit diagnostic criteria, start/finish date of recruitment]        |                       |        | x  |        |     |
|                                                                                   | Baseline study sample [i.e. individuals entering the study and their key characteristics and sampling frame are adequately described]       |                       |        | x  |        |     |
|                                                                                   | Study sample represents population of interest on key characteristics, sufficient to limit potential bias to results                        | High risk of bias     |        |    |        |     |
| Study attrition                                                                   | Response rate (i.e., proportion of study sample completing the study and providing outcome data) is adequate                                |                       | x      |    |        |     |
|                                                                                   | Participants lost to follow-up are adequately described for key characteristics                                                             |                       | x      |    |        |     |
|                                                                                   | Statement as to the possible effect on the results from missing data                                                                        |                       |        | x  |        |     |
|                                                                                   | Loss to follow-up is not associated with key characteristics                                                                                | High risk of bias     |        |    |        |     |
| Prognostic factor measurement                                                     | Clear definition of the prognostic factors measured is provided (e.g. imaging modality method, measurement, and timing described).          | x                     |        |    |        |     |
|                                                                                   | Specified instrument and personnel for measurement of predictive factors                                                                    |                       |        | x  |        |     |
|                                                                                   | Continuous variables are reported or appropriate (i.e. not data- dependent) cut-off points are used and specified a priori                  | x                     |        |    |        |     |
|                                                                                   | Blinding: were estimators of risk factor status and of outcomes blinded?                                                                    |                       |        | x  |        |     |
|                                                                                   | The prognostic factor(s) of interest is (are) adequately measured in study participants to sufficiently limit potential bias                | Moderate risk of bias |        |    |        |     |
| Outcome measurement                                                               | Is the outcome(s) clearly defined?                                                                                                          |                       |        | x  |        |     |
|                                                                                   | The outcome measure and method used are adequately valid and reliable to limit misclassification bias                                       | High risk of bias     |        |    |        |     |
| Study confounding                                                                 | Do the authors address potential confounders?                                                                                               |                       |        |    | x      |     |
|                                                                                   | Important potential confounders are appropriately accounted for, limiting potential bias with respect to the prognostic factor of interest. | High risk of bias     |        |    |        |     |
| Analysis and reporting                                                            | There is sufficient presentation of data to assess the adequacy of the analysis strategy and there is no selective reporting                |                       |        | x  |        |     |
|                                                                                   | The statistical analysis is appropriate for the study design, limiting potential for the presentation of invalid results                    | High risk of bias     |        |    |        |     |
| NA*: not applicable. Note: The above table was adapted from: Hayden et al., 2013. |                                                                                                                                             |                       |        |    |        |     |
| <b>Overall opinion of study quality= High risk of bias</b>                        |                                                                                                                                             |                       |        |    |        |     |

First Author: Nouth et al., 2011

ID: 6378752

| Potential Bias                                                                    | Items to be considered for assessment of potential opportunity for bias                                                                     | Yes                   | Partly | No | Unsure | NA* |
|-----------------------------------------------------------------------------------|---------------------------------------------------------------------------------------------------------------------------------------------|-----------------------|--------|----|--------|-----|
| Study population /sample selection                                                | Inclusion and exclusion criteria are adequately described [including explicit diagnostic criteria, start/finish date of recruitment]        | x                     |        |    |        |     |
|                                                                                   | Baseline study sample [i.e. individuals entering the study and their key characteristics and sampling frame are adequately described]       | x                     |        |    |        |     |
|                                                                                   | Study sample represents population of interest on key characteristics, sufficient to limit potential bias to results                        | Low risk of bias      |        |    |        |     |
| Study attrition                                                                   | Response rate (i.e., proportion of study sample completing the study and providing outcome data) is adequate                                | x                     |        |    |        |     |
|                                                                                   | Participants lost to follow-up are adequately described for key characteristics                                                             |                       |        |    |        | x   |
|                                                                                   | Statement as to the possible effect on the results from missing data                                                                        |                       |        |    | x      |     |
|                                                                                   | Loss to follow-up is not associated with key characteristics                                                                                | Low risk of bias      |        |    |        |     |
| Prognostic factor measurement                                                     | Clear definition of the prognostic factors measured is provided (e.g. imaging modality method, measurement, and timing described).          | x                     |        |    |        |     |
|                                                                                   | Specified instrument and personnel for measurement of predictive factors                                                                    | x                     |        |    |        |     |
|                                                                                   | Continuous variables are reported or appropriate (i.e. not data- dependent) cut-off points are used and specified a priori                  | x                     |        |    |        |     |
|                                                                                   | Blinding: were estimators of risk factor status and of outcomes blinded?                                                                    |                       |        |    | x      |     |
|                                                                                   | The prognostic factor(s) of interest is (are) adequately measured in study participants to sufficiently limit potential bias                | Low risk of bias      |        |    |        |     |
| Outcome measurement                                                               | Is the outcome(s) clearly defined?                                                                                                          |                       | x      |    |        |     |
|                                                                                   | The outcome measure and method used are adequately valid and reliable to limit misclassification bias                                       | Low risk of bias      |        |    |        |     |
| Study confounding                                                                 | Do the authors address potential confounders?                                                                                               | x                     |        |    |        |     |
|                                                                                   | Important potential confounders are appropriately accounted for, limiting potential bias with respect to the prognostic factor of interest. | Low risk of bias      |        |    |        |     |
| Analysis and reporting                                                            | There is sufficient presentation of data to assess the adequacy of the analysis strategy and there is no selective reporting                |                       | x      |    |        |     |
|                                                                                   | The statistical analysis is appropriate for the study design, limiting potential for the presentation of invalid results                    | Moderate risk of bias |        |    |        |     |
| NA*: not applicable. Note: The above table was adapted from: Hayden et al., 2013. |                                                                                                                                             |                       |        |    |        |     |
| <b>Overall opinion of study quality= Low risk of bias</b>                         |                                                                                                                                             |                       |        |    |        |     |

First Author: Pares et al., 2008

ID: 6378809

| Potential Bias                                                                    | Items to be considered for assessment of potential opportunity for bias                                                                     | Yes                   | Partly | No | Unsure | NA* |
|-----------------------------------------------------------------------------------|---------------------------------------------------------------------------------------------------------------------------------------------|-----------------------|--------|----|--------|-----|
| Study population /sample selection                                                | Inclusion and exclusion criteria are adequately described [including explicit diagnostic criteria, start/finish date of recruitment]        | x                     |        |    |        |     |
|                                                                                   | Baseline study sample [i.e. individuals entering the study and their key characteristics and sampling frame are adequately described]       | x                     |        |    |        |     |
|                                                                                   | Study sample represents population of interest on key characteristics, sufficient to limit potential bias to results                        | Low risk of bias      |        |    |        |     |
| Study attrition                                                                   | Response rate (i.e., proportion of study sample completing the study and providing outcome data) is adequate                                | x                     |        |    |        |     |
|                                                                                   | Participants lost to follow-up are adequately described for key characteristics                                                             |                       |        |    |        | x   |
|                                                                                   | Statement as to the possible effect on the results from missing data                                                                        |                       |        |    |        | x   |
|                                                                                   | Loss to follow-up is not associated with key characteristics                                                                                | Low risk of bias      |        |    |        |     |
| Prognostic factor measurement                                                     | Clear definition of the prognostic factors measured is provided (e.g. imaging modality method, measurement, and timing described).          | x                     |        |    |        |     |
|                                                                                   | Specified instrument and personnel for measurement of predictive factors                                                                    | x                     |        |    |        |     |
|                                                                                   | Continuous variables are reported or appropriate (i.e. not data- dependent) cut-off points are used and specified a priori                  | x                     |        |    |        |     |
|                                                                                   | Blinding: were estimators of risk factor status and of outcomes blinded?                                                                    |                       |        |    | x      |     |
|                                                                                   | The prognostic factor(s) of interest is (are) adequately measured in study participants to sufficiently limit potential bias                | Moderate risk of bias |        |    |        |     |
| Outcome measurement                                                               | Is the outcome(s) clearly defined?                                                                                                          | x                     |        |    |        |     |
|                                                                                   | The outcome measure and method used are adequately valid and reliable to limit misclassification bias                                       | Low risk of bias      |        |    |        |     |
| Study confounding                                                                 | Do the authors address potential confounders?                                                                                               | x                     |        |    |        |     |
|                                                                                   | Important potential confounders are appropriately accounted for, limiting potential bias with respect to the prognostic factor of interest. | Low risk of bias      |        |    |        |     |
| Analysis and reporting                                                            | There is sufficient presentation of data to assess the adequacy of the analysis strategy and there is no selective reporting                | x                     |        |    |        |     |
|                                                                                   | The statistical analysis is appropriate for the study design, limiting potential for the presentation of invalid results                    | Low risk of bias      |        |    |        |     |
| NA*: not applicable. Note: The above table was adapted from: Hayden et al., 2013. |                                                                                                                                             |                       |        |    |        |     |
| <b>Overall opinion of study quality= Low risk of bias</b>                         |                                                                                                                                             |                       |        |    |        |     |

First Author: Pattinson et al., 1991

ID: 74903015

| Potential Bias                                                                    | Items to be considered for assessment of potential opportunity for bias                                                                     | Yes                   | Partly | No | Unsure | NA* |
|-----------------------------------------------------------------------------------|---------------------------------------------------------------------------------------------------------------------------------------------|-----------------------|--------|----|--------|-----|
| Study population /sample selection                                                | Inclusion and exclusion criteria are adequately described [including explicit diagnostic criteria, start/finish date of recruitment]        | x                     |        |    |        |     |
|                                                                                   | Baseline study sample [i.e. individuals entering the study and their key characteristics and sampling frame are adequately described]       | x                     |        |    |        |     |
|                                                                                   | Study sample represents population of interest on key characteristics, sufficient to limit potential bias to results                        | Low risk of bias      |        |    |        |     |
| Study attrition                                                                   | Response rate (i.e., proportion of study sample completing the study and providing outcome data) is adequate                                |                       |        |    |        | x   |
|                                                                                   | Participants lost to follow-up are adequately described for key characteristics                                                             |                       |        |    |        | x   |
|                                                                                   | Statement as to the possible effect on the results from missing data                                                                        |                       |        |    |        | x   |
|                                                                                   | Loss to follow-up is not associated with key characteristics                                                                                | Low risk of bias      |        |    |        |     |
| Prognostic factor measurement                                                     | Clear definition of the prognostic factors measured is provided (e.g. imaging modality method, measurement, and timing described).          | x                     |        |    |        |     |
|                                                                                   | Specified instrument and personnel for measurement of predictive factors                                                                    |                       | x      |    |        |     |
|                                                                                   | Continuous variables are reported or appropriate (i.e. not data- dependent) cut-off points are used and specified a priori                  | x                     |        |    |        |     |
|                                                                                   | Blinding: were estimators of risk factor status and of outcomes blinded?                                                                    | x                     |        |    |        |     |
|                                                                                   | The prognostic factor(s) of interest is (are) adequately measured in study participants to sufficiently limit potential bias                | Low risk of bias      |        |    |        |     |
| Outcome measurement                                                               | Is the outcome(s) clearly defined?                                                                                                          |                       | x      |    |        |     |
|                                                                                   | The outcome measure and method used are adequately valid and reliable to limit misclassification bias                                       | Moderate risk of bias |        |    |        |     |
| Study confounding                                                                 | Do the authors address potential confounders?                                                                                               | x                     |        |    |        |     |
|                                                                                   | Important potential confounders are appropriately accounted for, limiting potential bias with respect to the prognostic factor of interest. | Low risk of bias      |        |    |        |     |
| Analysis and reporting                                                            | There is sufficient presentation of data to assess the adequacy of the analysis strategy and there is no selective reporting                |                       | x      |    |        |     |
|                                                                                   | The statistical analysis is appropriate for the study design, limiting potential for the presentation of invalid results                    | Moderate risk of bias |        |    |        |     |
| NA*: not applicable. Note: The above table was adapted from: Hayden et al., 2013. |                                                                                                                                             |                       |        |    |        |     |
| <b>Overall opinion of study quality= Low risk of bias</b>                         |                                                                                                                                             |                       |        |    |        |     |

First Author: Pattinson et al., 1993

ID: 6378815

| Potential Bias                                                                    | Items to be considered for assessment of potential opportunity for bias                                                                     | Yes                   | Partly | No | Unsure | NA* |
|-----------------------------------------------------------------------------------|---------------------------------------------------------------------------------------------------------------------------------------------|-----------------------|--------|----|--------|-----|
| Study population /sample selection                                                | Inclusion and exclusion criteria are adequately described [including explicit diagnostic criteria, start/finish date of recruitment]        | x                     |        |    |        |     |
|                                                                                   | Baseline study sample [i.e. individuals entering the study and their key characteristics and sampling frame are adequately described]       | x                     |        |    |        |     |
|                                                                                   | Study sample represents population of interest on key characteristics, sufficient to limit potential bias to results                        | Low risk of bias      |        |    |        |     |
| Study attrition                                                                   | Response rate (i.e., proportion of study sample completing the study and providing outcome data) is adequate                                | x                     |        |    |        |     |
|                                                                                   | Participants lost to follow-up are adequately described for key characteristics                                                             | x                     |        |    |        |     |
|                                                                                   | Statement as to the possible effect on the results from missing data                                                                        |                       |        |    | x      |     |
|                                                                                   | Loss to follow-up is not associated with key characteristics                                                                                | Low risk of bias      |        |    |        |     |
| Prognostic factor measurement                                                     | Clear definition of the prognostic factors measured is provided (e.g. imaging modality method, measurement, and timing described).          | x                     |        |    |        |     |
|                                                                                   | Specified instrument and personnel for measurement of predictive factors                                                                    |                       | x      |    |        |     |
|                                                                                   | Continuous variables are reported or appropriate (i.e. not data- dependent) cut-off points are used and specified a priori                  | x                     |        |    |        |     |
|                                                                                   | Blinding: were estimators of risk factor status and of outcomes blinded?                                                                    |                       |        |    | x      |     |
|                                                                                   | The prognostic factor(s) of interest is (are) adequately measured in study participants to sufficiently limit potential bias                | Moderate risk of bias |        |    |        |     |
| Outcome measurement                                                               | Is the outcome(s) clearly defined?                                                                                                          | x                     |        |    |        |     |
|                                                                                   | The outcome measure and method used are adequately valid and reliable to limit misclassification bias                                       | Low risk of bias      |        |    |        |     |
| Study confounding                                                                 | Do the authors address potential confounders?                                                                                               | x                     |        |    |        |     |
|                                                                                   | Important potential confounders are appropriately accounted for, limiting potential bias with respect to the prognostic factor of interest. | Low risk of bias      |        |    |        |     |
| Analysis and reporting                                                            | There is sufficient presentation of data to assess the adequacy of the analysis strategy and there is no selective reporting                | x                     |        |    |        |     |
|                                                                                   | The statistical analysis is appropriate for the study design, limiting potential for the presentation of invalid results                    | Low risk of bias      |        |    |        |     |
| NA*: not applicable. Note: The above table was adapted from: Hayden et al., 2013. |                                                                                                                                             |                       |        |    |        |     |
| <b>Overall opinion of study quality= Low risk of bias</b>                         |                                                                                                                                             |                       |        |    |        |     |

First Author: Phupong et al., 2003

ID: 6378830

| Potential Bias                                                                    | Items to be considered for assessment of potential opportunity for bias                                                                     | Yes              | Partly | No | Unsure | NA* |
|-----------------------------------------------------------------------------------|---------------------------------------------------------------------------------------------------------------------------------------------|------------------|--------|----|--------|-----|
| Study population /sample selection                                                | Inclusion and exclusion criteria are adequately described [including explicit diagnostic criteria, start/finish date of recruitment]        | x                |        |    |        |     |
|                                                                                   | Baseline study sample [i.e. individuals entering the study and their key characteristics and sampling frame are adequately described]       | x                |        |    |        |     |
|                                                                                   | Study sample represents population of interest on key characteristics, sufficient to limit potential bias to results                        | Low risk of bias |        |    |        |     |
| Study attrition                                                                   | Response rate (i.e., proportion of study sample completing the study and providing outcome data) is adequate                                | x                |        |    |        |     |
|                                                                                   | Participants lost to follow-up are adequately described for key characteristics                                                             | x                |        |    |        |     |
|                                                                                   | Statement as to the possible effect on the results from missing data                                                                        |                  |        |    |        | x   |
|                                                                                   | Loss to follow-up is not associated with key characteristics                                                                                | Low risk of bias |        |    |        |     |
| Prognostic factor measurement                                                     | Clear definition of the prognostic factors measured is provided (e.g. imaging modality method, measurement, and timing described).          | x                |        |    |        |     |
|                                                                                   | Specified instrument and personnel for measurement of predictive factors                                                                    | x                |        |    |        |     |
|                                                                                   | Continuous variables are reported or appropriate (i.e. not data- dependent) cut-off points are used and specified a priori                  | x                |        |    |        |     |
|                                                                                   | Blinding: were estimators of risk factor status and of outcomes blinded?                                                                    | x                |        |    |        |     |
|                                                                                   | The prognostic factor(s) of interest is (are) adequately measured in study participants to sufficiently limit potential bias                | Low risk of bias |        |    |        |     |
| Outcome measurement                                                               | Is the outcome(s) clearly defined?                                                                                                          | x                |        |    |        |     |
|                                                                                   | The outcome measure and method used are adequately valid and reliable to limit misclassification bias                                       | Low risk of bias |        |    |        |     |
| Study confounding                                                                 | Do the authors address potential confounders?                                                                                               | x                |        |    |        |     |
|                                                                                   | Important potential confounders are appropriately accounted for, limiting potential bias with respect to the prognostic factor of interest. | Low risk of bias |        |    |        |     |
| Analysis and reporting                                                            | There is sufficient presentation of data to assess the adequacy of the analysis strategy and there is no selective reporting                | x                |        |    |        |     |
|                                                                                   | The statistical analysis is appropriate for the study design, limiting potential for the presentation of invalid results                    | Low risk of bias |        |    |        |     |
| NA*: not applicable. Note: The above table was adapted from: Hayden et al., 2013. |                                                                                                                                             |                  |        |    |        |     |
| <b>Overall opinion of study quality= Low risk of bias</b>                         |                                                                                                                                             |                  |        |    |        |     |



First Author: Rani et al., 2016

ID: 74903020

| Potential Bias                                                                    | Items to be considered for assessment of potential opportunity for bias                                                                     | Yes                   | Partly | No | Unsure | NA* |
|-----------------------------------------------------------------------------------|---------------------------------------------------------------------------------------------------------------------------------------------|-----------------------|--------|----|--------|-----|
| Study population /sample selection                                                | Inclusion and exclusion criteria are adequately described [including explicit diagnostic criteria, start/finish date of recruitment]        | x                     |        |    |        |     |
|                                                                                   | Baseline study sample [i.e. individuals entering the study and their key characteristics and sampling frame are adequately described]       |                       | x      |    |        |     |
|                                                                                   | Study sample represents population of interest on key characteristics, sufficient to limit potential bias to results                        | Moderate risk of bias |        |    |        |     |
| Study attrition                                                                   | Response rate (i.e., proportion of study sample completing the study and providing outcome data) is adequate                                |                       |        |    |        | x   |
|                                                                                   | Participants lost to follow-up are adequately described for key characteristics                                                             |                       |        |    |        | x   |
|                                                                                   | Statement as to the possible effect on the results from missing data                                                                        |                       |        |    |        | x   |
|                                                                                   | Loss to follow-up is not associated with key characteristics                                                                                | Low risk of bias      |        |    |        |     |
| Prognostic factor measurement                                                     | Clear definition of the prognostic factors measured is provided (e.g. imaging modality method, measurement, and timing described).          | x                     |        |    |        |     |
|                                                                                   | Specified instrument and personnel for measurement of predictive factors                                                                    |                       | x      |    |        |     |
|                                                                                   | Continuous variables are reported or appropriate (i.e. not data- dependent) cut-off points are used and specified a priori                  |                       | x      |    |        |     |
|                                                                                   | Blinding: were estimators of risk factor status and of outcomes blinded?                                                                    |                       |        | x  |        |     |
|                                                                                   | The prognostic factor(s) of interest is (are) adequately measured in study participants to sufficiently limit potential bias                | Moderate risk of bias |        |    |        |     |
| Outcome measurement                                                               | Is the outcome(s) clearly defined?                                                                                                          | x                     |        |    |        |     |
|                                                                                   | The outcome measure and method used are adequately valid and reliable to limit misclassification bias                                       | Low risk of bias      |        |    |        |     |
| Study confounding                                                                 | Do the authors address potential confounders?                                                                                               |                       | x      |    |        |     |
|                                                                                   | Important potential confounders are appropriately accounted for, limiting potential bias with respect to the prognostic factor of interest. | Moderate risk of bias |        |    |        |     |
| Analysis and reporting                                                            | There is sufficient presentation of data to assess the adequacy of the analysis strategy and there is no selective reporting                |                       | x      |    |        |     |
|                                                                                   | The statistical analysis is appropriate for the study design, limiting potential for the presentation of invalid results                    | Moderate risk of bias |        |    |        |     |
| NA*: not applicable. Note: The above table was adapted from: Hayden et al., 2013. |                                                                                                                                             |                       |        |    |        |     |
| <b>Overall opinion of study quality= Moderate risk of bias</b>                    |                                                                                                                                             |                       |        |    |        |     |

First Author: Rocca et al., 1995

ID: 74903016

| Potential Bias                                                                    | Items to be considered for assessment of potential opportunity for bias                                                                     | Yes                   | Partly | No | Unsure | NA* |
|-----------------------------------------------------------------------------------|---------------------------------------------------------------------------------------------------------------------------------------------|-----------------------|--------|----|--------|-----|
| Study population /sample selection                                                | Inclusion and exclusion criteria are adequately described [including explicit diagnostic criteria, start/finish date of recruitment]        | x                     |        |    |        |     |
|                                                                                   | Baseline study sample [i.e. individuals entering the study and their key characteristics and sampling frame are adequately described]       |                       | x      |    |        |     |
|                                                                                   | Study sample represents population of interest on key characteristics, sufficient to limit potential bias to results                        | Moderate risk of bias |        |    |        |     |
| Study attrition                                                                   | Response rate (i.e., proportion of study sample completing the study and providing outcome data) is adequate                                |                       |        |    |        | x   |
|                                                                                   | Participants lost to follow-up are adequately described for key characteristics                                                             |                       |        |    |        | x   |
|                                                                                   | Statement as to the possible effect on the results from missing data                                                                        |                       |        |    |        | x   |
|                                                                                   | Loss to follow-up is not associated with key characteristics                                                                                | Low risk of bias      |        |    |        |     |
| Prognostic factor measurement                                                     | Clear definition of the prognostic factors measured is provided (e.g. imaging modality method, measurement, and timing described).          | x                     |        |    |        |     |
|                                                                                   | Specified instrument and personnel for measurement of predictive factors                                                                    |                       | x      |    |        |     |
|                                                                                   | Continuous variables are reported or appropriate (i.e. not data- dependent) cut-off points are used and specified a priori                  | x                     |        |    |        |     |
|                                                                                   | Blinding: were estimators of risk factor status and of outcomes blinded?                                                                    |                       |        | x  |        |     |
|                                                                                   | The prognostic factor(s) of interest is (are) adequately measured in study participants to sufficiently limit potential bias                | Moderate risk of bias |        |    |        |     |
| Outcome measurement                                                               | Is the outcome(s) clearly defined?                                                                                                          |                       | x      |    |        |     |
|                                                                                   | The outcome measure and method used are adequately valid and reliable to limit misclassification bias                                       | Moderate risk of bias |        |    |        |     |
| Study confounding                                                                 | Do the authors address potential confounders?                                                                                               |                       | x      |    |        |     |
|                                                                                   | Important potential confounders are appropriately accounted for, limiting potential bias with respect to the prognostic factor of interest. | Moderate risk of bias |        |    |        |     |
| Analysis and reporting                                                            | There is sufficient presentation of data to assess the adequacy of the analysis strategy and there is no selective reporting                |                       | x      |    |        |     |
|                                                                                   | The statistical analysis is appropriate for the study design, limiting potential for the presentation of invalid results                    | Moderate risk of bias |        |    |        |     |
| NA*: not applicable. Note: The above table was adapted from: Hayden et al., 2013. |                                                                                                                                             |                       |        |    |        |     |
| <b>Overall opinion of study quality= Moderate risk of bias</b>                    |                                                                                                                                             |                       |        |    |        |     |

First Author: Verma et al., 2016

ID: 6379243

| Potential Bias                                                                    | Items to be considered for assessment of potential opportunity for bias                                                                     | Yes              | Partly | No | Unsure | NA* |
|-----------------------------------------------------------------------------------|---------------------------------------------------------------------------------------------------------------------------------------------|------------------|--------|----|--------|-----|
| Study population /sample selection                                                | Inclusion and exclusion criteria are adequately described [including explicit diagnostic criteria, start/finish date of recruitment]        | x                |        |    |        |     |
|                                                                                   | Baseline study sample [i.e. individuals entering the study and their key characteristics and sampling frame are adequately described]       | x                |        |    |        |     |
|                                                                                   | Study sample represents population of interest on key characteristics, sufficient to limit potential bias to results                        | Low risk of bias |        |    |        |     |
| Study attrition                                                                   | Response rate (i.e., proportion of study sample completing the study and providing outcome data) is adequate                                | x                |        |    |        |     |
|                                                                                   | Participants lost to follow-up are adequately described for key characteristics                                                             |                  |        |    |        | x   |
|                                                                                   | Statement as to the possible effect on the results from missing data                                                                        |                  |        |    | x      |     |
|                                                                                   | Loss to follow-up is not associated with key characteristics                                                                                | Low risk of bias |        |    |        |     |
| Prognostic factor measurement                                                     | Clear definition of the prognostic factors measured is provided (e.g. imaging modality method, measurement, and timing described).          | x                |        |    |        |     |
|                                                                                   | Specified instrument and personnel for measurement of predictive factors                                                                    | x                |        |    |        |     |
|                                                                                   | Continuous variables are reported or appropriate (i.e. not data- dependent) cut-off points are used and specified a priori                  | x                |        |    |        |     |
|                                                                                   | Blinding: were estimators of risk factor status and of outcomes blinded?                                                                    |                  |        |    | x      |     |
|                                                                                   | The prognostic factor(s) of interest is (are) adequately measured in study participants to sufficiently limit potential bias                | Low risk of bias |        |    |        |     |
| Outcome measurement                                                               | Is the outcome(s) clearly defined?                                                                                                          | x                |        |    |        |     |
|                                                                                   | The outcome measure and method used are adequately valid and reliable to limit misclassification bias                                       | Low risk of bias |        |    |        |     |
| Study confounding                                                                 | Do the authors address potential confounders?                                                                                               | x                |        |    |        |     |
|                                                                                   | Important potential confounders are appropriately accounted for, limiting potential bias with respect to the prognostic factor of interest. | Low risk of bias |        |    |        |     |
| Analysis and reporting                                                            | There is sufficient presentation of data to assess the adequacy of the analysis strategy and there is no selective reporting                | x                |        |    |        |     |
|                                                                                   | The statistical analysis is appropriate for the study design, limiting potential for the presentation of invalid results                    | Low risk of bias |        |    |        |     |
| NA*: not applicable. Note: The above table was adapted from: Hayden et al., 2013. |                                                                                                                                             |                  |        |    |        |     |
| <b>Overall opinion of study quality= Low risk of bias</b>                         |                                                                                                                                             |                  |        |    |        |     |

First Author: Waa et al., 2010

ID: 6379255

| Potential Bias                                                                    | Items to be considered for assessment of potential opportunity for bias                                                                     | Yes                   | Partly | No | Unsure | NA* |
|-----------------------------------------------------------------------------------|---------------------------------------------------------------------------------------------------------------------------------------------|-----------------------|--------|----|--------|-----|
| Study population /sample selection                                                | Inclusion and exclusion criteria are adequately described [including explicit diagnostic criteria, start/finish date of recruitment]        | x                     |        |    |        |     |
|                                                                                   | Baseline study sample [i.e. individuals entering the study and their key characteristics and sampling frame are adequately described]       | x                     |        |    |        |     |
|                                                                                   | Study sample represents population of interest on key characteristics, sufficient to limit potential bias to results                        | Low risk of bias      |        |    |        |     |
| Study attrition                                                                   | Response rate (i.e., proportion of study sample completing the study and providing outcome data) is adequate                                | x                     |        |    |        |     |
|                                                                                   | Participants lost to follow-up are adequately described for key characteristics                                                             | x                     |        |    |        |     |
|                                                                                   | Statement as to the possible effect on the results from missing data                                                                        | x                     |        |    |        |     |
|                                                                                   | Loss to follow-up is not associated with key characteristics                                                                                | Low risk of bias      |        |    |        |     |
| Prognostic factor measurement                                                     | Clear definition of the prognostic factors measured is provided (e.g. imaging modality method, measurement, and timing described).          | x                     |        |    |        |     |
|                                                                                   | Specified instrument and personnel for measurement of predictive factors                                                                    | x                     |        |    |        |     |
|                                                                                   | Continuous variables are reported or appropriate (i.e. not data- dependent) cut-off points are used and specified a priori                  | x                     |        |    |        |     |
|                                                                                   | Blinding: were estimators of risk factor status and of outcomes blinded?                                                                    |                       |        | x  |        |     |
|                                                                                   | The prognostic factor(s) of interest is (are) adequately measured in study participants to sufficiently limit potential bias                | Low risk of bias      |        |    |        |     |
| Outcome measurement                                                               | Is the outcome(s) clearly defined?                                                                                                          |                       | x      |    |        |     |
|                                                                                   | The outcome measure and method used are adequately valid and reliable to limit misclassification bias                                       | Moderate risk of bias |        |    |        |     |
| Study confounding                                                                 | Do the authors address potential confounders?                                                                                               |                       | x      |    |        |     |
|                                                                                   | Important potential confounders are appropriately accounted for, limiting potential bias with respect to the prognostic factor of interest. | Moderate risk of bias |        |    |        |     |
| Analysis and reporting                                                            | There is sufficient presentation of data to assess the adequacy of the analysis strategy and there is no selective reporting                |                       | x      |    |        |     |
|                                                                                   | The statistical analysis is appropriate for the study design, limiting potential for the presentation of invalid results                    | Moderate risk of bias |        |    |        |     |
| NA*: not applicable. Note: The above table was adapted from: Hayden et al., 2013. |                                                                                                                                             |                       |        |    |        |     |
| <b>Overall opinion of study quality= Moderate risk of bias</b>                    |                                                                                                                                             |                       |        |    |        |     |

First Author: Yelikar et al., 2013

ID: 6379339

| Potential Bias                                                                    | Items to be considered for assessment of potential opportunity for bias                                                                     | Yes                   | Partly | No | Unsure | NA* |
|-----------------------------------------------------------------------------------|---------------------------------------------------------------------------------------------------------------------------------------------|-----------------------|--------|----|--------|-----|
| Study population /sample selection                                                | Inclusion and exclusion criteria are adequately described [including explicit diagnostic criteria, start/finish date of recruitment]        | x                     |        |    |        |     |
|                                                                                   | Baseline study sample [i.e. individuals entering the study and their key characteristics and sampling frame are adequately described]       | x                     |        |    |        |     |
|                                                                                   | Study sample represents population of interest on key characteristics, sufficient to limit potential bias to results                        | Low risk of bias      |        |    |        |     |
| Study attrition                                                                   | Response rate (i.e., proportion of study sample completing the study and providing outcome data) is adequate                                |                       | x      |    |        |     |
|                                                                                   | Participants lost to follow-up are adequately described for key characteristics                                                             |                       |        |    | x      |     |
|                                                                                   | Statement as to the possible effect on the results from missing data                                                                        |                       |        |    | x      |     |
|                                                                                   | Loss to follow-up is not associated with key characteristics                                                                                | Moderate risk of bias |        |    |        |     |
| Prognostic factor measurement                                                     | Clear definition of the prognostic factors measured is provided (e.g. imaging modality method, measurement, and timing described).          | x                     |        |    |        |     |
|                                                                                   | Specified instrument and personnel for measurement of predictive factors                                                                    |                       | x      |    |        |     |
|                                                                                   | Continuous variables are reported or appropriate (i.e. not data- dependent) cut-off points are used and specified a priori                  | x                     |        |    |        |     |
|                                                                                   | Blinding: were estimators of risk factor status and of outcomes blinded?                                                                    |                       |        | x  |        |     |
|                                                                                   | The prognostic factor(s) of interest is (are) adequately measured in study participants to sufficiently limit potential bias                | Moderate risk of bias |        |    |        |     |
| Outcome measurement                                                               | Is the outcome(s) clearly defined?                                                                                                          |                       | x      |    |        |     |
|                                                                                   | The outcome measure and method used are adequately valid and reliable to limit misclassification bias                                       | Moderate risk of bias |        |    |        |     |
| Study confounding                                                                 | Do the authors address potential confounders?                                                                                               | x                     |        |    |        |     |
|                                                                                   | Important potential confounders are appropriately accounted for, limiting potential bias with respect to the prognostic factor of interest. | Low risk of bias      |        |    |        |     |
| Analysis and reporting                                                            | There is sufficient presentation of data to assess the adequacy of the analysis strategy and there is no selective reporting                |                       | x      |    |        |     |
|                                                                                   | The statistical analysis is appropriate for the study design, limiting potential for the presentation of invalid results                    | Moderate risk of bias |        |    |        |     |
| NA*: not applicable. Note: The above table was adapted from: Hayden et al., 2013. |                                                                                                                                             |                       |        |    |        |     |
| <b>Overall opinion of study quality= Moderate risk of bias</b>                    |                                                                                                                                             |                       |        |    |        |     |

First Author: Zarean et al., 2018

ID: 6379369

| Potential Bias                                                                    | Items to be considered for assessment of potential opportunity for bias                                                                     | Yes                   | Partly | No | Unsure | NA* |
|-----------------------------------------------------------------------------------|---------------------------------------------------------------------------------------------------------------------------------------------|-----------------------|--------|----|--------|-----|
| Study population /sample selection                                                | Inclusion and exclusion criteria are adequately described [including explicit diagnostic criteria, start/finish date of recruitment]        | x                     |        |    |        |     |
|                                                                                   | Baseline study sample [i.e. individuals entering the study and their key characteristics and sampling frame are adequately described]       |                       | x      |    |        |     |
|                                                                                   | Study sample represents population of interest on key characteristics, sufficient to limit potential bias to results                        | Moderate risk of bias |        |    |        |     |
| Study attrition                                                                   | Response rate (i.e., proportion of study sample completing the study and providing outcome data) is adequate                                | x                     |        |    |        |     |
|                                                                                   | Participants lost to follow-up are adequately described for key characteristics                                                             |                       |        |    |        | x   |
|                                                                                   | Statement as to the possible effect on the results from missing data                                                                        |                       |        |    |        | x   |
|                                                                                   | Loss to follow-up is not associated with key characteristics                                                                                | Low risk of bias      |        |    |        |     |
| Prognostic factor measurement                                                     | Clear definition of the prognostic factors measured is provided (e.g. imaging modality method, measurement, and timing described).          | x                     |        |    |        |     |
|                                                                                   | Specified instrument and personnel for measurement of predictive factors                                                                    | x                     |        |    |        |     |
|                                                                                   | Continuous variables are reported or appropriate (i.e. not data- dependent) cut-off points are used and specified a priori                  | x                     |        |    |        |     |
|                                                                                   | Blinding: were estimators of risk factor status and of outcomes blinded?                                                                    |                       |        |    | x      |     |
|                                                                                   | The prognostic factor(s) of interest is (are) adequately measured in study participants to sufficiently limit potential bias                | Low risk of bias      |        |    |        |     |
| Outcome measurement                                                               | Is the outcome(s) clearly defined?                                                                                                          |                       | x      |    |        |     |
|                                                                                   | The outcome measure and method used are adequately valid and reliable to limit misclassification bias                                       | Moderate risk of bias |        |    |        |     |
| Study confounding                                                                 | Do the authors address potential confounders?                                                                                               | x                     |        |    |        |     |
|                                                                                   | Important potential confounders are appropriately accounted for, limiting potential bias with respect to the prognostic factor of interest. | Low risk of bias      |        |    |        |     |
| Analysis and reporting                                                            | There is sufficient presentation of data to assess the adequacy of the analysis strategy and there is no selective reporting                | x                     |        |    |        |     |
|                                                                                   | The statistical analysis is appropriate for the study design, limiting potential for the presentation of invalid results                    | Low risk of bias      |        |    |        |     |
| NA*: not applicable. Note: The above table was adapted from: Hayden et al., 2013. |                                                                                                                                             |                       |        |    |        |     |
| <b>Overall opinion of study quality= Low risk of bias</b>                         |                                                                                                                                             |                       |        |    |        |     |
