# Supplementary material for: Prognostic accuracy of antenatal Doppler ultrasound for adverse perinatal outcomes in low-income and middle-income countries: a systematic review
Source: HighWire-hosted journal article supplement (doi:10.1136/bmjopen-2021-049799), 2021-12-01
Supplement: bmjopen-2021-049799supp006_data_supplement.pdf [file bmjopen-2021-049799supp006_data_supplement.pdf]

**Table S2.** Definitions of adverse perinatal outcomes reported in the selected studies

| First Author          | Outcomes                      | Definition (detailed description in the article)                                                                                                                                   |
|-----------------------|-------------------------------|------------------------------------------------------------------------------------------------------------------------------------------------------------------------------------|
| Abdallah et al., 2019 | LBW                           | Not defined                                                                                                                                                                        |
|                       | NICU admission                | Not defined                                                                                                                                                                        |
|                       | Stillbirth                    | Not defined                                                                                                                                                                        |
|                       | Perinatal mortality           | Not defined                                                                                                                                                                        |
|                       | Low APGAR score (1min & 5min) | Not defined                                                                                                                                                                        |
| Agbaje et al., 2018   | FGR                           | Abnormal birth weight: defined as estimated foetal weight below the 10th percentile for gestational age and abdominal circumference below the 10th percentile for gestational age. |
|                       | Low APGAR score at 5 minutes  | APGAR score less than 6                                                                                                                                                            |
| Alanwar et al., 2018  | Acidosis                      | Neonatal acidemia of pH < 7.2                                                                                                                                                      |
|                       | NICU admission                | New-born was admitted to the neo- natal intensive care unit                                                                                                                        |
|                       | Low APGAR score at 5 minutes  | APGAR score < 7 at 5 min                                                                                                                                                           |
| Allam et al., 2013    | Neonatal acidosis             | Cord blood pH <7.25                                                                                                                                                                |
| Anshul et al., 2010   | Stillbirth                    | Not defined                                                                                                                                                                        |
|                       | Neonatal death                | Not defined                                                                                                                                                                        |
|                       | NICU admission                | Admission required                                                                                                                                                                 |
|                       | Foetal distress               | Delivered by emergency caesarean section for suspected foetal distress                                                                                                             |
|                       | LBW                           | Not defined                                                                                                                                                                        |
|                       | Low APGAR score at birth.     | APGAR score <7 at birth                                                                                                                                                            |
| Bano et al., 2010     | Perinatal death               | Not defined                                                                                                                                                                        |
|                       | Foetal distress               | Caesarean section for foetal distress (FD not defined)                                                                                                                             |
|                       | NICU admission                | Not defined                                                                                                                                                                        |
|                       | Low APGAR score at 5min       | APGAR score <7 at 5 min                                                                                                                                                            |
|                       | FGR                           | Birth weight less than 10 <sup>th</sup> percentile for gestational age                                                                                                             |

|                       |                                     |                                                                                                                                                                                                                                                                                                                                                                                                                                                                                         |
|-----------------------|-------------------------------------|-----------------------------------------------------------------------------------------------------------------------------------------------------------------------------------------------------------------------------------------------------------------------------------------------------------------------------------------------------------------------------------------------------------------------------------------------------------------------------------------|
|                       | Composite adverse perinatal outcome | Not defined                                                                                                                                                                                                                                                                                                                                                                                                                                                                             |
| Dhand et al., 2011    | Composite adverse perinatal outcome | Abnormal foetal outcome (details not provided)                                                                                                                                                                                                                                                                                                                                                                                                                                          |
| Dorman et al., 2002   | Perinatal death                     | Not defined                                                                                                                                                                                                                                                                                                                                                                                                                                                                             |
|                       | Preterm delivery                    | Delivery < 37 weeks                                                                                                                                                                                                                                                                                                                                                                                                                                                                     |
|                       | LBW                                 | Birth weight <2.5kg                                                                                                                                                                                                                                                                                                                                                                                                                                                                     |
| Ebrashy et al., 2005  | Acidosis                            | Neonatal acidaemia of pH<7.2 were present                                                                                                                                                                                                                                                                                                                                                                                                                                               |
|                       | Composite adverse neonatal outcome  | Neonatal morbidity (neonatal academia pH<7.2, 5-minute APGAR score <6, and/or admission to NICU)                                                                                                                                                                                                                                                                                                                                                                                        |
| Geerts et al., 2007   | Composite adverse perinatal outcome | Poor outcome (perinatal demise or clinical/ultrasound signs of neurological compromise in the infant at the time of discharge from the tertiary institution)                                                                                                                                                                                                                                                                                                                            |
| Khanduri et al., 2013 | FGR                                 | Ponderal index was calculated as birth weight (in gm) per length (in cm <sup>3</sup> ). Ponderal index of <10 indicates growth restriction.                                                                                                                                                                                                                                                                                                                                             |
| Kumari et al., 2019   | Foetal anaemia                      | Haematocrit of the umbilical cord blood was used as the reference test to diagnose foetal anaemia (defined as haemoglobin <0.65 times the median for gestational age).                                                                                                                                                                                                                                                                                                                  |
| Lakhkar et al., 2006  | Composite adverse perinatal outcome | Adverse perinatal outcome (Major and Minor). Major adverse outcomes were perinatal deaths including intrauterine and early neonatal deaths. Major complications like hypoxic ischemic encephalopathy, intraventricular haemorrhage, periventricular leukomalacia, pulmonary haemorrhage and necrotizing enterocolitis. Minor outcomes include-caesarean delivery for foetal distress, APGAR score below 7 at 5 minutes, admission to NICU (neonatal intensive care unit) for treatment. |
| Lakshmi et al., 2013  | Neonatal death                      | Not defined                                                                                                                                                                                                                                                                                                                                                                                                                                                                             |
|                       | Respiratory distress syndrome       | Not defined                                                                                                                                                                                                                                                                                                                                                                                                                                                                             |
|                       | Composite adverse perinatal outcome | Composite outcome of death or major neuro-morbidity at 12-18 months of corrected age, defined as presence of cerebral palsy or visual or hearing impairment.                                                                                                                                                                                                                                                                                                                            |
| Malik et al., 2013    | Composite adverse perinatal outcome | Abnormal foetal outcome (IUGR, IUFD and perinatal mortality)                                                                                                                                                                                                                                                                                                                                                                                                                            |
| Masihi et al.2019     | Intrapartum foetal distress         | Emergency caesarean section for foetal distress                                                                                                                                                                                                                                                                                                                                                                                                                                         |
| Mullick et al., 1993  | FGR                                 | Not defined                                                                                                                                                                                                                                                                                                                                                                                                                                                                             |
| Nagar et al., 2015    | FGR                                 | Not defined                                                                                                                                                                                                                                                                                                                                                                                                                                                                             |
| Najam et al., 2016    | FGR                                 | Not defined                                                                                                                                                                                                                                                                                                                                                                                                                                                                             |

|                        |                                     |                                                                                                                                                                                                                                                                                                                                   |
|------------------------|-------------------------------------|-----------------------------------------------------------------------------------------------------------------------------------------------------------------------------------------------------------------------------------------------------------------------------------------------------------------------------------|
|                        | NICU admission                      | Not defined                                                                                                                                                                                                                                                                                                                       |
|                        | Foetal distress                     | Not defined                                                                                                                                                                                                                                                                                                                       |
|                        | Stillbirth                          | Not defined                                                                                                                                                                                                                                                                                                                       |
|                        | Neonatal death                      | Not defined                                                                                                                                                                                                                                                                                                                       |
|                        | Low APGAR score                     | Not defined                                                                                                                                                                                                                                                                                                                       |
|                        | Hypoxic ischemic encephalopathy     | Not defined                                                                                                                                                                                                                                                                                                                       |
|                        | Meconium aspiration syndrome        | Not defined.                                                                                                                                                                                                                                                                                                                      |
| Nouh et al., 2011      | Composite adverse perinatal outcome | The presence of one or more of the following; miscarriage, gestational DM, PIH, PE, antepartum haemorrhage, intrauterine growth retardation, instrumental, caesarean delivery and preterm labour.                                                                                                                                 |
| Pares et al., 2008     | Foetal anaemia                      | Anaemia was considered moderate to severe when foetal haemoglobin concentrations were < or =0.64 multiples of the median for gestational age.                                                                                                                                                                                     |
| Pattinson et al., 1991 | Composite adverse perinatal outcome | Poor foetal outcome (details not provided).                                                                                                                                                                                                                                                                                       |
| Pattinson et al., 1993 | Composite adverse perinatal outcome | Complications of pregnancy, namely intra-uterine growth retardation and proteinuric hypertension.                                                                                                                                                                                                                                 |
| Phupong et al., 2003   | FGR                                 | Birth weight less than 10 percentile for gestational age.                                                                                                                                                                                                                                                                         |
| Rani et al., 2016      | Composite adverse perinatal outcome | Adverse perinatal outcome was defined as any of these: small for gestational age, still birth, APGAR score <5 at 5 minutes, need of bag and mask ventilation for >10 minutes or hypoxic ischemic encephalopathy, admission to neonatal intensive care unit (NICU), and caesarean section due to non-reassuring foetal heart rate. |
| Rocca et al., 1995     | IUGR                                | Not defined.                                                                                                                                                                                                                                                                                                                      |
|                        | Low APGAR score 5mins               | APGAR score <7 at 5 minutes.                                                                                                                                                                                                                                                                                                      |
|                        | Perinatal death                     | Not defined.                                                                                                                                                                                                                                                                                                                      |
|                        | Foetal distress                     | Emergency operative delivery for foetal distress.                                                                                                                                                                                                                                                                                 |
| Verma et al., 2016     | FGR                                 | Not defined.                                                                                                                                                                                                                                                                                                                      |
|                        | LBW                                 | Birth weight <2500 gm.                                                                                                                                                                                                                                                                                                            |
|                        | Preterm delivery                    | Spontaneous delivery <37 weeks.                                                                                                                                                                                                                                                                                                   |

|                      |                                     |                                                                                                                                                                                                                                                                                                                                                            |
|----------------------|-------------------------------------|------------------------------------------------------------------------------------------------------------------------------------------------------------------------------------------------------------------------------------------------------------------------------------------------------------------------------------------------------------|
|                      | Composite adverse perinatal outcome | At least one adverse outcome (preeclampsia, FGR, low birth weight, spontaneous preterm delivery, oligohydramnios, foetal loss).                                                                                                                                                                                                                            |
| Waa et al., 2010     | Composite adverse perinatal outcome | Poor outcome was defined by foetal mortality or appearance, pulse rate, grimace, activity, respiration (APGAR) score less than eight at five minutes or weight less than 10 <sup>th</sup> percentile for gestation 20 or head circumference and length below 10 <sup>th</sup> percentile for gestation.                                                    |
| Yelikar et al., 2013 | Intrapartum foetal distress         | Delivered by emergency caesarean section for suspected foetal distress.                                                                                                                                                                                                                                                                                    |
| Zarean et al., 2018  | Composite adverse perinatal outcome | Adverse perinatal outcome, including preterm labour, intrauterine foetal death, PE, low 5-min APGAR score (<7), low umbilical arterial cord blood pH, admitted to Intensive Care Unit in the first 3 days of birth, low birth weight, infant with low weight, death of new-borns, caesarean section for respiratory distress, and meconial amniotic fluid. |

<sup>a</sup>FGR: fetal growth restriction; FGR: intrauterine growth restriction; LBW: low birth weight; NICU: neonatal intensive care unit.
